# Supplementary material for: Global genetic diversity, introgression, and evolutionary adaptation of indicine cattle revealed by whole genome sequencing
Source: PubMed Central journal article supplement (PMC10684552; doi:10.1038/s41467-023-43626-z), 2023-11-28
Supplement: 41467_2023_43626_MOESM2_ESM.pdf [file 41467_2023_43626_MOESM2_ESM.pdf]

## Peer Review File

---

Global genetic diversity, introgression and evolutionary adaptation of indicine cattle revealed by whole genome sequencing

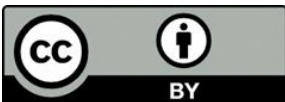

**Open Access** This file is licensed under a Creative Commons Attribution 4.0 International License, which permits use, sharing, adaptation, distribution and reproduction in any medium or format, as long as you give appropriate credit to the original author(s) and the source, provide a link to the Creative Commons license, and indicate if changes were made. In the cases where the authors are anonymous, such as is the case for the reports of anonymous peer reviewers, author attribution should be to 'Anonymous Referee' followed by a clear attribution to the source work. The images or other third party material in this file are included in the article's Creative Commons license, unless indicated otherwise in a credit line to the material. If material is not included in the article's Creative Commons license and your intended use is not permitted by statutory regulation or exceeds the permitted use, you will need to obtain permission directly from the copyright holder. To view a copy of this license, visit <http://creativecommons.org/licenses/by/4.0/>.

## REVIEWER COMMENTS

### Reviewer #1 (Remarks to the Author):

#### General comments

Chen et al. present the results of whole-genome resequencing of 355 indicine cattle genomes and 141 taurine cattle genomes from 57 and 17 populations, respectively. The quantity and quality of the material studied here, the methods used and the results obtained are of a high standard and deserve publication in a high-ranking journal. However, the main problem concerns the core zebu breed group and the outgroups.

Regarding the core Zebu group: The Zebu cattle breeds from India were missing in this study. The surrogates used for this purpose are Gir, Nellore and Brahman, which were bred outside India for centuries in new environments and with sporadic interchange with *Bos taurus* breeds. Introgression of *Bos taurus* into the WGS of Gir, Nellore and Brahman used here is neither ruled out nor investigated by the authors. Brahman in particular is known to be a synthetic breed with *Bos taurus* content. Many countries such as Sri Lanka, Pakistan and Nepal (SAI group) use *Bos taurus* breeds to improve local cattle breeds. Therefore, the purity of any reference used for introgression studies should be tested first.

With regard to outgroups: Besides bison and yak, two Bantengs and two Bours are used for important introgression analyses in this study. Again, there is a possibility of introgression of cattle into Banteng and/or Bours. This possibility has not been ruled out and has not been investigated. There are some unpublished results confirming cattle DNA segments in Bantengs. I do not have comparable information for Gaur, but this is possible. As shown in the study analysing cattle introgression in Yak, RFMix can produce false positive signals if the reference population is itself introgressed.

The next problem is the sample size of the outgroups (Banteng and Guar) in the introgression analysis. I expect that the relatively small sample size of the outgroups (2 samples each) will affect the performance of RFMix and the determination of ancestral alleles and their frequencies in the U20 and U50 analyses. In fact, the original paper of RFMix already describes how the sample size of the reference panel affects its performance (<https://www.ncbi.nlm.nih.gov/pmc/articles/PMC3738819/figure/fig6/>). How did the authors determine the robustness of their results?

The results of the D-statistics are confounded by the structure of the ancestral population as well as incomplete lineage sorting. I recommend that the authors perform other independent approaches, e.g. those based solely on branch length and tree discordance, to validate these results.

How did the authors determine the optimal number of migration edges in the TreeMix? Ideally, they should also include the matrix of residual values to show how integrating migration edges improved the % of variance explained.

How did the authors determine the expected length of introgressed haplotypes? How did they make sure that it is significantly different from the expected length because of its shared ancestral origin? Does the length of introgressed haplotypes tell us anything about the age of introgression?

Each figure and table, including supplementary figures and tables, should be considered as a stand-alone object, i.e. the readers should be able to understand it without reading other objects. For this reason, the legend of the figure or table must be informative enough to explain the main message of this stand-alone object. This is not the case. I make a specific comment for one figure only (mentioned in the comments below), but it applies to all and is therefore a general comment.

#### Specific comments

Line 87-88, "...resilient to local pathogens": consider replacing with tick resistance as also mentioned in the reference paper cited here.

Line 106-108: Please keep in mind that there is a small but significant *Bos indicus* introgression also into almost all south-eastern European cattle breeds up to the southern Alps (<https://doi.org/10.1186/s12711-020-00560-8>).

Line 108-109, "...Gujarat in Western India": While the reference paper do discuss the hypothesis about possible wild introgression in southern Indian zebu, the same is not mentioned for Gujarat, consider rewriting this sentence.

Line 144-145, "thirteen whole genome sequencing data...": The authors should mention here the number of WGS used for each species separately.

Line 166-167, "...the PCA and a phylogenetic tree..": The authors should describe here how SWCI fits into the overall phylogenetic reconstruction.

Line 176-178, "We identified candidate selected genomic regions...": Why author only combined the three indicine groups (SAI, AFI, EAI) and left the other two (SEAI and SWCI) for this analysis?

Line 175ff: The authors use reverse genomics to detect candidate genes. They constructed two groups of animals/populations: 1) taurine and 2) SAI, AFI and EAI indicine populations. Both groups lived in environments that differed by a variety of factors, including temperature. The authors found numerous significantly differentiated regions and attribute them all to adaptation to high temperatures. The idea of reverse genomics is to find the outliers and then look for possible causes. Only after some causality analysis can we conclude that some of the outliers are an adaptation to high temperatures or something else. The authors should consider significant selection signatures as anonymous candidates. These anonymous candidates are subject to positive selection into a group of animals that share a specific environment. These anonymous candidates could, but need not, be caused

by one specific environmental factor.

Line 182-183, "In addition, the expression level...": As the tissue and animals (with respect to gender and age) are quite heterogenous, I will take this result with pinch of salt, moreover, how many other genes were differentially expressed and not under positive selection?

Line 192-195: Again, the authors link LIPH to a possible contribution to heat tolerance in indicine cattle by controlling hair length and/or thickness. However, we (readers) are not informed whether indicine and taurine cattle differ in hair length and thickness? I cannot find any such information in this manuscript.

Line 202ff: The SAI cattle group consists of breeds from Sri Lanka, Pakistan and Nepal (a very broad area), but all outliers are defined as candidates for adaptation to semi-arid environmental stress.

Line 223, "The genome-wide analysis shows...SAI origin": This is well-established fact; therefore, I would remove it or declare as confirmation.

Line 319-321: With regard to mtDNA distribution, a comparable situation can be observed in AFI and EAI. However, the presence of haplogroup T in Africa was not interpreted as T having emerged as a new haplogroup during the indicine westward migration, but as a haplogroup that was already present in the area before the indicine introgression. The authors should consider both the time of coalescence and the time of migration when drawing their conclusions.

Line 346-361: Samples originating from India and sampled there are missing in this study. This could be a reason why the west-east cline is missing and an abrupt transition is observed. I did not understand this section of the text. There are several problems in the text itself and in the corresponding figures. The legends of the figures are generally not informative enough. Let's just take Supplementary Figure 17 as an example. The reader cannot understand this figure from its legend. Even more, there are many trees labelled with the same A, B, C,.... and we do not know which tree represents which haplotype, etc. I also do not know what to conclude from figure 50, i.e. the legend does not help me to understand the message from line 355-357.

Line 414: (in brackets)???

Line 447-458: Two recent and comprehensive studies on paternal and maternal haplogroups in cattle could be helpful here (DOI: 10.1111/eva.13315 and doi: 10.1111/age.13104).

Line 459-470: This can be understood to mean that East Asia was a land without cattle, so that *Bos indicus* spread with the single matriline I1a in this empty area. This was also the case with the spread of domestic sheep in Europe. However, for sheep, there is

archaeological evidence for a sheep-less Europe before the Neolithic. Do you have any evidence that East Asia was a cattle-less region before the spread of *Bos indicus*? Africa was not cattle-less either, and as a result of paternal introgression we only observe haplogroup T. Please clarify.

Line 470-475: The reason behind this could be lack of sampled population along the inland trading routes from South to East Asia. Therefore, the integrated genetic analyses as mentioned in the paper may have difficulty supporting inland trading even if this is correct.

Line 558-559, “Treemix and Dsuite...”: Dsuite is a tool and not any method, please clarify this.

Supplementary table 1:

If possible, the country of origin should also be mentioned, also verify that breeds with Name “SriLanka” exists.

Supplementary table 2:

Haryana is declared as an Indian breed and the sample used here was sequenced in Chen et al. 2018 and should be from India. We know that India is very restrictive when it comes to foreign use of biological resources. There is no Indian collaborator in Chen et al. 2018, so I do not see any legal way to analyze Indian biological material outside India or without an Indian collaborator. Was this Haryana cattle sampled in India or elsewhere? Please clarify and correct if necessary in Supplementary Table 2.

### **Reviewer #2 (Remarks to the Author):**

This manuscript is interesting and provides data from a unique sample of individuals that had not been previously characterized. Overall, I find the manuscript well written, although it appears to have been done in parts by different groups of individuals with different writing styles and slightly different nomenclature. This is inevitable with a project of this size. I would encourage the corresponding authors to go through the entire manuscript to make it more uniform. I do have a number of concerns related to the details that were presented, or not presented, that make a final determination not possible at this time.

I always start my reviews with the materials and methods but since there was such a substantial amount of information in the supplemental information, I will start there. Unfortunately, the supplemental document does not have line nor page numbers, so I'll quote specific lines.

Whole-genome resequencing

“Additional detailed information on the mapping rate and sequencing depth are provided in Supplementary Table 1” In Sup. Table 1 you use the SRR\* ID as the sample. This is incorrect

because these are run IDs. You should use the BioSample ID. I downloaded this table and compared these SRR to the NCBI database and you have two duplicate samples. SRR2016752 and SRR2016754 are the same SAMN3387026 individual. With only a single duplicate, it is unlikely that any of the results would have been significantly affected. However, this table needs to be corrected to present the BioSample and if data reanalysis is performed, one of these two should be removed.

#### Population genomic analyses Genetic diversity

“Runs of homozygosity (ROH) were identified using the `--homozyg` option implemented in PLINK v.1.9, which slides a window of 50 SNPs (`--homozyg-window-snp 50`) across the genome.” This is a very small window considering the density of markers. It is well recognized that results are sensitive to settings for this analysis (see <https://doi.org/10.1186/s12864-020-6463-x>). I question whether or not the settings used were appropriate. Specifically, by using too small of a window size and other inappropriate settings, far too many ROH are detected. Evidence of this can be seen in Supplementary Fig. 2 where there are a significant number of samples that have estimated ROH totaling greater than 1/3 of the genome and a large number of samples with ROH greater than half the genome. This is unrealistic. This analysis needs to be redone with appropriate settings, which may need to be determined empirically given the data. It would also be useful at this time to examine any correlation between average genome coverage and number/length of ROH as one would predict that lower coverage samples will have heterozygous sites undercalled which may manifest as ROH when in fact there are not ROH if heterozygous positions were called accurately.

#### Principal component analysis (PCA)

“We removed “all LD” using...” First, please rephrase this. You did not remove “all LD”. I have the same objection here to the parameters used. First, this is a very small window and probably left a significant number of loci with  $r^2 > 0.20$  which are more than 50kb apart. Given everything that we know regarding LD in bovine genomes, you should empirically find the appropriate setting for this analysis to achieve the desired thinning. This does not have to be done genome-wide and one could simply use 10Mb from any autosome to estimate what the appropriate parameters should be. My recommendation would be to use chr25 since we know there are no assembly issues. For a 10Mb region, calculate \*all\* the pairwise LD values using ‘-r2 yes really’ and examine the distribution of these values. This figure can be included in the supplement to provide justification for the settings chosen. As the manuscript is currently written, the settings are arbitrary and likely impacted the results and interpretation.

“PCA was performed on the genome-wide unlinked SNP dataset...” Please change the word “unlinked” throughout the manuscript. You do not have any unlinked variants. Perhaps use “LD pruned” as a replacement.

#### Structure analysis

“...200 bootstrap replicates were performed...” Why 200? Why not 10, or 10,000. Is the

default of 200 appropriate for your data?

“...used to determine the optimal ancestry number...” Exactly how did you determine the optimal number? There is quite a bit of literature on this, but nothing was stated or cited.

Neighbor-joining (NJ) and maximum likelihood (ML) phylogenetic trees

“...A window size of 1,000 SNPs was used to account for linkage disequilibrium...” This should be unnecessary if you properly LD pruned in the first place. This brings up another issue I have with the manuscript. You have many different analyses and it is difficult to tell exactly which set of loci you are using for which analysis. In this section, it appears that you are using the “raw” 67M variants. However, it seems to me that if the objective is to “identify closely related individuals” then the LD pruned dataset from the PCA section would be appropriate. However, it appears that these two analyses used different filtering. My recommendation would be to provide a supplemental table that lists the major analyses performed and exactly which data manipulations were done for each analysis. Since data manipulations may impact one analysis but not another, it would be helpful to the reader to understand exactly what was done and which analyses used the same loci. Furthermore, you can specify the total number of loci in this table for each dataset.

Detection of selection signatures shared by all indicine populations

“...were calculated for 50-kb windows with a 20 kb step across the autosomes...” Line 907 of the main manuscript says that a 100kb window was used, which is it? I have issues with what is specified here. Typically, these types of analyses are performed where the window size is an integer multiple of the step size. For instance 25 kb step and 50 kb window or 20kb step and 100kb window. This needs to be addressed throughout the manuscript and I would recommend using the same parameters for all analyses that use this type of setting (where appropriate). This will make comparisons between analyses much easier.

“...these windows harbored 117 candidate genes in indicine cattle...” I don’t think these 117 genes are specific to indicine cattle and you can probably just say cattle. By saying indicine cattle here one might think you are implying that these are not in taurine cattle, which isn’t the case.

“...the expression levels of these 117 candidate genes were validated in nine different tissues of taurine and indicine cattle.” I’m not sure exactly what you are validating? The fact that there are RNA-seq data in those tissues for these annotated genes simply validates that the annotation is correct.

“Candidate genes under selection were defined as those overlapped by sweep regions or within 20 kb of the signals.” 20kb seems arbitrary. What justification do you have for choosing 20kb? Why not 50kb, or 10 kb or simply require the gene to fall within the sweep region and not allow any overlap. It seems to me that allowing for a gene to be outside your sweep region, by some arbitrary distance, speaks to your confidence in defining the boundaries of sweep regions. Some justification should be given for whatever value you choose.

“...were plotted using a 10-kb sliding window...” Again, arbitrary. Why not use the same window size for plotting that you used for detection?

Detection of selection signatures in SAI, EAI, and AFI lineages

“...windows of 50 kb and a step of 20 kb...” Same comment on windows.

“...the overlap windows of P values less than 0.005 (Z test) of each method were considered candidate signatures of selection...” Why 0.005? Again, some justification is warranted. It seems to me that you have an extraordinarily large number of windows that were tested which implies that some adjustment needs to be considered for multiple testing.

Appropriately accounting for multiple testing here could significantly change the detected regions which in turn could significantly impact all downstream inference based on these results. As written, it is impossible to determine exactly what was done and what impact it may have on the results or interpretation.

“Only pathways or annotations with a Bonferroni-corrected  $P < 10^{-2}$  were retained (Supplementary Tables 7-10).” This should probably be written as  $P < 0.01$  to be consistent throughout the manuscript.

Introgression analysis

“Phylogenetic analyses of these segments confirmed the banteng or gaur introgression into specific EAI individuals.” Exactly how does this \*confirm\* introgression?

“Therefore, we used the statistic  $U_{20SAI}$ , EAI, banteng (1%, 20%, and 100%) 20, which was equal to the number of SNPs within a genomic window where a particular allele was fixed at a frequency of 100% in banteng but at a frequency less than 1% in SAI cattle or greater than 20% in EAI cattle.” For both the banteng and gaur analyses you only have two individuals of each species. This means that you have essentially no ability to estimate allele frequencies in gaur and banteng. This means that all of your results from analyses of this type are suspect, which in turn means that inference based on these results is suspect. There are more than two of each of these publicly available in SRA and your analysis would be significantly strengthened by using what is available to increase your sample size, which will allow you to better estimate allele frequencies in these species.

Paternal analysis

“...(i) only present in at least two males but not in females; (ii) hemizygous...” Are these not represented as homozygous in the actual data? In reality, the males are hemizygous but they are represented as homozygous when variant calling.

“BEAGLE was used to impute missing alleles.” Were samples set to homozygous for imputation and you simply pretended as if this was an autosome? Exactly how was Beagle run for Y-specific loci? The underlying model includes recombination rate, which is zero for the Y. It’s unclear to me how this was performed.

Whole mitogenome phylogeny



“...samples with a depth of coverage lower than 100× were disregarded.” Why? The depth of coverage on the MT is a function of the overall average genome coverage and the tissue source for the DNA. This biases the analysis against samples that were sourced from semen. A more appropriate threshold would be to look at the average coverage of the MT relative to the average of the autosomes. What you will find is that tissue sourced from semen will have similar MT coverage to the autosomes while tissue sourced from anything other than semen will have exceedingly high MT coverage. Regardless of coverage, you can assemble the MT reads from all of the samples and then perform an evaluation of MT genome completeness versus coverage and set some (non-arbitrary) threshold for what samples you use for downstream analysis. In summary, I think you may be leaving information on the table by setting this arbitrary threshold.

Estimation of effective population size and divergence time

It is unclear which variants were used and how the phasing was done. Both of these details need to be fully documented since both impact the downstream analysis.

Supplementary Fig. 4 & 5

This shows the results and the percentages for the first and second PCs are very small, especially given the number of samples. Supplemental Fig 5A shows that the percentages get even smaller when PCA is performed on the indicine samples only. This data should be better filtered to get a more informative PCA. This raises further questions related to my comments under the PCA section. I'm not convinced that this was done properly and therefore the results and interpretation are suspect.

Main manuscript which I'll just refer to line numbers.

L102 Change disposal to dispersal.

Line 182 Fig.2. Personally, I hate these figures. They look pretty but show nothing of substantive value because of the resolution (genome coordinates). It is up to the authors as to whether to include it but I feel that it is a waste of space.

L182-183 It is unclear why this is important or even relevant. Differentially expressed genes implies that a regulatory variant has been selected differently between the two groups of animals. However, a coding region variant may have been selected differently between the two groups and not change expression levels. What if you would have selected a different set of tissues? My point is that this analysis does nothing to further define what may be the underlying cause of the region to be differentially selected between the two groups (assuming the region truly is a selection target) and simply adds noise to the discussion. I would argue that this same observation could be made for a large number of regions randomly selected from the genome. However, without quantifying this, you are making a lot of assumptions to relate gene expression differences to putative selection regions.

L185 It appears to me that this is actually two regions. In fact, you list it as two regions but

you describe it as a single region. This needs to be reconciled.

L192-198 All of this is speculation. While I am not opposed to some level of speculation, I am opposed to adaptive storytelling. If you truly identified a functionally plausible gene, and you believe your underlying sequence data, then you should be able to identify a plausible candidate mutation (or mutations) to explain your data. If you are going to state this, then why not do the follow-up analyses to try to identify the actual mutation(s)? I believe a deep dive into this would be far more valuable than what was done.

L242-243 The SEMA3F Val650Ala variant appears to be 22:50162746 which is at frequency 0.033 in the 1000 Bulls Run9 data and is at frequency of 0.034 in my own UMAG1 data based on ~5500 samples. There are a lot of other protein altering variants in this gene, this just happens to be one of them. It is unclear how you arrived at this particular variant. I think the manuscript would be significantly improved if the authors tried to dissect some of these and do a more thorough analysis rather than simply list gene names.

L262-265 I previously listed my concerns with this analysis. Adding to this, for almost all other analyses you used sliding windows. However, here you state that you used non-overlapping windows, why?

L267 Sup. Figs 18-21. For Supp. Fig 19 has banteng in one part but gaur in the other. This needs fixed.

For supp Fig 18 & 19, this looks like a lot of random noise to me and I suspect it has something to do with the banteng/gaur N=2 issue. Were consecutive windows merged? The size of these regions should be informative for the timing of the introgression but nothing was mentioned about this. I suspect due to the previous issues I've already raised.

For supp Fig 20 & 21, how was a p-value calculated? I could not find this.

L281 Exactly how does this provide validation?

L292-294 What is the call rate for these 11 loci in the raw data? Can you rule out any effect imputation may have had in this region? This is the most compelling evidence shown thus far. I would recommend a deeper dive in this region to try to further strengthen your inference.

L318 Supp Fig 45 legend says 2 panels but there is only 1. Fig 46 shows  $N_e$  increasing in recent times which is contrary to everything we know about cattle demography. Perhaps this relates to my next point.

L325-344 This paragraph leads off with MSMC but it is unclear to me how you can use the Y and MT in an MSMC analysis when the underlying model is based on recombination?

L402-446 This is all speculation. Again, some is useful but this is 1.5 pages. I would recommend that a deeper dive into any one or two of these would be more valuable to the

reader that speculating on all of them.

L439-440 Proposes that EAI cattle may have introgression from a Bos-like ghost species as an explanation for hemoglobin-related genes. Since hybridization and introgression from known Bos species is difficult, and these large numbers of divergent sequences appear in only this family of genes, is it possible that this 'ghost' group is a lost population of EAI-like Indicine cattle, or that these mutations were specific to the extant EAI clade without any introgression?

Methods

L491-493 were duplicate reads marked or removed? The 1000 Bulls spec is for them to be marked. I just want to be sure that what is stated is what was actually done. Along those lines, the spec has indel realignment and BQSR but that is not stated in the manuscript. Please accurately specify what was actually done.

L494 "...depth (for all individuals) > 1/3× and < 3×..." I have no idea what this represents, please clarify.

L500 Please specify BEAGLE parameters that were used. If defaults were used, then state that. Additionally, you specify SNPs here, were only SNPs used or did you also use indels. Please specify. Did you make any attempt to evaluate the accuracy of imputation? If so, you should state that. If not, I would encourage you to evaluate this and include this information in any filtering that you perform.

L502 This is based on an annotation version, in which case you should specify the exact file or annotation version that was used to make it reproducible.

L547 I've already discussed the multiple testing issue and choice of  $p < 0.005$ .

L557 Introgression analyses... How might a MAF threshold of 0.01 filtering affected these analyses?

L573 Same comment about the GTF version.

L583 Already commented on the Y chromosome imputation.

Figure 3 panels B-C and D-E appear to be switched relative to the legend. 10kb sliding window appears to be different than what is described in the M&M.

I waive anonymity for all manuscripts and grants that I review and sign my reviews, Robert Schnabel.

1 **Response to Reviewers' comments**

2 **[Comment of Reviewer #1]**

3 General comments

4 Chen et al. present the results of whole-genome resequencing of 355 indicine cattle genomes  
5 and 141 taurine cattle genomes from 57 and 17 populations, respectively. The quantity and  
6 quality of the material studied here, the methods used and the results obtained are of a high  
7 standard and deserve publication in a high-ranking journal. However, the main problem  
8 concerns the core zebu breed group and the outgroups. Regarding the core Zebu group: The  
9 Zebu cattle breeds from India were missing in this study. The surrogates used for this purpose  
10 are Gir, Nellore and Brahman, which were bred outside India for centuries in new environments  
11 and with sporadic interchange with *Bos taurus* breeds. Introgression of *Bos taurus* into the WGS  
12 of Gir, Nellore and Brahman used here is neither ruled out nor investigated by the authors.  
13 Brahman in particular is known to be a synthetic breed with *Bos taurus* content. Many countries  
14 such as Sri Lanka, Pakistan and Nepal (SAI group) use *Bos taurus* breeds to improve local  
15 cattle breeds. Therefore, the purity of any reference used for introgression studies should be  
16 tested first.

17 ***Response:** Thank you for this valuable comment, we apologize that we did not provide a clear  
18 description of the reference populations used for introgression studies.*

19 *In this study, we used Gir, Nellore, and Brahman breeds, but they were grouped as American  
20 indicine (AMI) and were not included in the South Asian indicine (SAI) group. Cattle in Sri  
21 Lanka, Pakistan and Nepal are authentic SAI zebu breeds.*

22 *In our study, for the reference groups used for introgression analysis, we selected only 40 core  
23 and pure indicine cattle that are included and verified in the results of admixture analysis. We  
24 provided this information in Supplementary Table 1. We selected indicine individuals without  
25 taurine ancestry. We apologize for not describing this in previous version of our manuscript.  
26 According to your suggestions, we also added  $f_3$  statistics to confirm that the selected indicine  
27 cattle have a pure genomic background. Our results showed that the reference SAI cattle did  
28 not carry either taurine or banteng/gaur ancestries.*

29

30 **[Comment of Reviewer #1]**

31 With regard to outgroups: Besides bison and yak, two Bantengs and two Bours are used for  
32 important introgression analyses in this study. Again, there is a possibility of introgression of  
33 cattle into Banteng and/or Bours. This possibility has not been ruled out and has not been  
34 investigated. There are some unpublished results confirming cattle DNA segments in Bantengs.  
35 I do not have comparable information for Gaur, but this is possible. As shown in the study  
36 analysing cattle introgression in Yak, RFMix can produce false positive signals if the reference  
37 population is itself introgressed.

38 ***Response:** Thank you for this valuable comment.*

39 *We totally agree with you on this point. Introgression of zebu into banteng or gaur has also*

40 *been documented (Wu et al., 2018. Ref.15; Gao et al., DOI:10.1038/s41598-017-16438-7). To*  
41 *address your concern, we tested for introgression of cattle into banteng and gaur. The  $f_3$*   
42 *statistic showed that there was no introgression into the banteng or gaur samples included in*  
43 *this study.*

44 *We added this information to the Supplementary Information. We further used the U20 statistic*  
45 *and phylogenetic trees of specific genes to verify this point, which in our view provided*  
46 *compelling evidence for introgression (Fig. 5D, Suppl. Figs. 16 to 28) and clustering of East*  
47 *Asian indicine haplotypes within the banteng or gaur haplotypes.*

48

49 **[Comment of Reviewer #1]**

50 The next problem is the sample size of the outgroups (Banteng and Guar) in the introgression  
51 analysis. I expect that the relatively small sample size of the outgroups (2 samples each) will  
52 affect the performance of RFMix and the determination of ancestral alleles and their frequencies  
53 in the U20 and U50 analyses. In fact, the original paper of RFMix already describes how the  
54 sample size of the reference panel affects its performance (<https://www.ncbi.nlm.nih.gov/pmc/articles/PMC3738819/figure/fig6/>). How did the authors determine the robustness of their  
55 results?  
56

57 **Response:** *Thank you for this valuable comment.*

58 *Of course, we would like to have more samples, but for wild animals, this is very difficult*  
59 *because of CITES regulations. However, we have added six banteng and three gaur samples to*  
60 *increase the number of samples of our reference group. And we reanalyzed the introgression*  
61 *from banteng or gaur using U20 and RFMix analyse.*

62 *To confirm banteng or gaur introgression, we also analyzed the tree topologies of banteng or*  
63 *gaur fragments and their homologous sequences in other bovine species belonging. This*  
64 *indicated unambiguously a banteng or gaur origin of the introgressed segments.*

65

66 **[Comment of Reviewer #1]**

67 The results of the  $D$ -statistics are confounded by the structure of the ancestral population as  
68 well as incomplete lineage sorting. I recommend that the authors perform other independent  
69 approaches, e.g. those based solely on branch length and tree discordance, to validate these  
70 results.

71 **Response:** *Thank you for this valuable comment.*

72 *We have added more approaches to identify and verify the introgressions. We first ruled out*  
73 *introgressed fragments that were likely caused by incomplete lineage sorting (ILS) according*  
74 *to a probability calculation (see Supplementary Note 4). We also analyzed the distribution of*  
75 *tree topologies of banteng or gaur fragments and their homologous sequences in other bovine*  
76 *species. This confirmed the banteng and gaur origins of the introgressions (Supplementary Fig.*  
77 *6).*

78

79 **[Comment of Reviewer #1]**

80 How did the authors determine the optimal number of migration edges in the TreeMix? Ideally,  
81 they should also include the matrix of residual values to show how integrating migration edges  
82 improved the % of variance explained.

83 *Response: Thank you for this valuable comment. We added a matrix of residual values in*  
84 *Supplementary Fig. 14. We also added the optimal number of migrations using OptM.*

85

86 **[Comment of Reviewer #1]**

87 How did the authors determine the expected length of introgressed haplotypes? How did they  
88 make sure that it is significantly different from the expected length because of its shared  
89 ancestral origin? Does the length of introgressed haplotypes tell us anything about the age of  
90 introgression?

91 *Response: Thank you for this concern.*

92 *According to your suggestion, we have added more banteng and gaur samples for inferring*  
93 *their introgressions. In our revised version, we modeled the expected length of ancestral*  
94 *sequence shared by indicine cattle, banteng and gaur on the basis of incomplete lineage sorting*  
95 *(ILS). The expected length of a shared ancestral sequence is  $L = 1 / (r \times t)$ , where  $r$  is the*  
96 *recombination rate of 1.23 cM/Mb (Weng et al. 2014), and  $t$  is the branch length between cattle*  
97 *and Asian wild bovine species (banteng and gaur). We used a generation time of 6 years and a*  
98 *divergence time of 1000 kya (Wu et al. 2018). We calculated the probability of ILS. The*  
99 *probability of a shared haplotype length derived from ILS according to the algorithm is  $1 -$*   
100 *GammaCDF ( $m$ , shape = 2, rate =  $1/L$ ), where GammaCDF is gamma distribution function.*  
101 *We ruled out the introgressed fragments < 980 bp that were likely caused by ILS with a*  
102 *probability < 0.05. We realize that this calculation, although according to the state-of-the-art,*  
103 *assumes a fixed recombination rate and does not account for the plausible effects of divergence*  
104 *between maternal and paternal haplotypes on the probability of recombinations. For this*  
105 *reason, we did not try to infer an age of the introgressions.*

106

107 **[Comment of Reviewer #1]**

108 Each figure and table, including supplementary figures and tables, should be considered as a  
109 stand-alone object, i.e. the readers should be able to understand it without reading other objects.  
110 For this reason, the legend of the figure or table must be informative enough to explain the main  
111 message of this stand-alone object. This is not the case. I make a specific comment for one  
112 figure only (mentioned in the comments below), but it applies to all and is therefore a general  
113 comment.

114 *Response: Thank you for this specific comment.*

115 *We have revised all supplementary figures and tables to ensure that could be easily understood.*

116

117 **[Comment of Reviewer #1]**

118 Specific comments

119 Line 87-88, “..resilient to local pathogens”: consider replacing with tick resistance as also  
120 mentioned in the reference paper cited here.

121 ***Response:** Thank you for this suggestion! We have corrected this sentence as suggested.*

122

123 **[Comment of Reviewer #1]**

124 Line 106-108: Please keep in mind that there is a small but significant Bos indicus introgression  
125 also into almost all south-eastern European cattle breeds up to the southern Alps  
126 (<https://doi.org/10.1186/s12711-020-00560-8>).

127 ***Response:** Thank you for this valuable comment!*

128 *We have added this information to the Introduction as follow: “Modern DNA analyses have  
129 well documented the male-mediated indicine admixture into African taurine cattle in the eastern,  
130 western and southern areas of the continent <sup>7,11</sup> and small but significant indicine introgression  
131 into almost all southeastern European cattle breeds <sup>12</sup>”.*

132

133 **[Comment of Reviewer #1]**

134 Line 108-109, “...Gujarat in Western India”: While the reference paper do discuss the  
135 hypothesis about possible wild introgression in southern Indian zebu, the same is not mentioned  
136 for Gujarat, consider rewriting this sentence.

137 ***Response:** Thank you for this suggestion! We have deleted this sentence for a rigorous quotation.*

138

139 **[Comment of Reviewer #1]**

140 Line 144-145, “thirteen whole genome sequencing data...”: The authors should mention here  
141 the number of WGS used for each species separately.

142 ***Response:** Thank you for this specific comment! We have added the number of whole genome  
143 sequences used for each species as follows in the revised version: “We also used sequencing  
144 data of 22 whole genomes from six other bovine species, including two bison, two wisent, five  
145 gaur, eight banteng, two yak, and two water buffaloes, as outgroups or for introgression  
146 analysis.*

147 **[Comment of Reviewer #1]**

148 Line 166-167, “...the PCA and a phylogenetic tree..”: The authors should describe here how  
149 SWCI fits into the overall phylogenetic reconstruction.

150 ***Response:** Thank you for this valuable comment!*

151 *We have revised this part and added this information to the description as follows: “SWCI is  
152 genetically in an intermediate position between SEAI and EAI”. According to the comments of  
153 Reviewer 2, we reanalyzed the SNP data for structure analysis, and we redefined the population  
154 ancestries. The PCA and phylogenetic tree almost completely separated the three indicine  
155 geographic lineages of SAI, AFI, and EAI. SWCI was in an intermediate position between SEAI  
156 and EAI.*

157

158 **[Comment of Reviewer #1]**

159 Line 176-178, “We identified candidate selected genomic regions...”: Why author only  
160 combined the three indicine groups (SAI, AFI, EAI) and left the other two (SEAI and SWCI)  
161 for this analysis?

162 **Response:** *Thank you for this specific inquiry!*

163 *We reasoned that the SEAI and SWCI have hybrid SAI-EAI ancestries, so we did not select these*  
164 *two groups. Thus, we believe that the three indicine groups of SAI, AFI, and EAI adequately*  
165 *represent the indicine cattle ancestry.*

166

167 **[Comment of Reviewer #1]**

168 Line 175ff: The authors use reverse genomics to detect candidate genes. They constructed two  
169 groups of animals/populations: 1) taurine and 2) SAI, AFI and EAI indicine populations. Both  
170 groups lived in environments that differed by a variety of factors, including temperature. The  
171 authors found numerous significantly differentiated regions and attribute them all to adaptation  
172 to high temperatures. The idea of reverse genomics is to find the outliers and then look for  
173 possible causes. Only after some causality analysis can we conclude that some of the outliers  
174 are an adaptation to high temperatures or something else. The authors should consider  
175 significant selection signatures as anonymous candidates. These anonymous candidates are  
176 subject to positive selection into a group of animals that share a specific environment. These  
177 anonymous candidates could, but need not, be caused by one specific environmental factor.

178 **Response:** *Thank you for this valuable comment and suggestion!*

179 *We agree that our selection signatures do not necessarily indicate a specific adaptation to high-*  
180 *temperature. We have modified the headings of Lines 174 and 175 as follows:*

181 *“The ancestral adaptation of indicine cattle*

182 *Ancestral environmental adaptation of South Asian indicine”.*

183 *Furthermore, this text is added after line 198 as follows: “However, further research is*  
184 *warranted to test their role in heat adaptation or other differences between indicine and taurine*  
185 *cattle.”*

186

187 **[Comment of Reviewer #1]**

188 Line 182-183, “In addition, the expression level...”: As the tissue and animals (with respect to  
189 gender and age) are quite heterogenous, I will take this result with pinch of salt, moreover, how  
190 many other genes were differentially expressed and not under positive selection?

191 **Response:** *Thank you for this valuable comment!*

192 *To address your concerns and to avoid misleading results, we have deleted this part.*

193

194 **[Comment of Reviewer #1]**

195 Line 192-195: Again, the authors link LIPH to a possible contribution to heat tolerance in



196 indicine cattle by controlling hair length and/or thickness. However, we (readers) are not  
197 informed whether indicine and taurine cattle differ in hair length and thickness? I cannot find  
198 any such information in this manuscript.

199 **Response:** *Thank you for this valuable comment! We have added a description of the difference*  
200 *between taurine and indicine cattle in the Introduction as follows:*

201 *“Indicine cattle are recognized by their thoracic hump, low metabolic rate, many large sweat*  
202 *glands, large skin surface, and short smooth coat<sup>5</sup>.”*

203

204 **[Comment of Reviewer #1]**

205 Line 202ff: The SAI cattle group consists of breeds from Sri Lanka, Pakistan and Nepal (a very  
206 broad area), but all outliers are defined as candidates for adaptation to semi-arid environmental  
207 stress.

208 **Response:** *Thank you for this thoughtful comment! We agree that our selection signatures do*  
209 *not necessarily indicate a specific adaptation. We have modified the headings of Lines 174 and*  
210 *175:*

211 *“The ancestral adaptation of indicine cattle*

212 *Ancestral environmental adaptation of South Asian indicine”*

213 *After line 199 we added a sentence as follows: “However, further research is warranted to test*  
214 *their roles in heat adaptation or other differences between indicine and taurine cattle”.*

215

216 **[Comment of Reviewer #1]**

217 Line 223, “The genome-wide analysis shows...SAI origin”: This is well-established fact;  
218 therefore, I would remove it or declare as confirmation.

219 **Response:** *Thank you for this valuable suggestion. We have removed this sentence.*

220

221 **[Comment of Reviewer #1]**

222 Line 319-321: With regard to mtDNA distribution, a comparable situation can be observed in  
223 AFI and EAI. However, the presence of haplogroup T in Africa was not interpreted as T having  
224 emerged as a new haplogroup during the indicine westward migration, but as a haplogroup that  
225 was already present in the area before the indicine introgression. The authors should consider  
226 both the time of coalescence and the time of migration when drawing their conclusions.

227 **Response:** *Thank you for these important comment and suggestion!*

228 *Indeed, several studies have shown that the mtDNA of African indicine cattle originates from*  
229 *taurine cattle that were already present in Africa prior to the introduction of indicine cattle (see*  
230 *lines 455-458; ref. 7 (Kim et al., 2020, The mosaic genome of indigenous African cattle as a*  
231 *unique genetic resource for African 691 pastoralism. Nature Genetics 52, 1099-1110); and ref.*  
232 *11 (Kim et al., 2017, The genome landscape of indigenous African cattle. Genome Biology 18,*  
233 *34).*

234

235 **[Comment of Reviewer #1]**

236 Line 346-361: Samples originating from India and sampled there are missing in this study. This  
237 could be a reason why the west-east cline is missing and an abrupt transition is observed. I did  
238 not understand this section of the text. There are several problems in the text itself and in the  
239 corresponding figures. The legends of the figures are generally not informative enough. Let's  
240 just take Supplementary Figure 17 as an example. The reader cannot understand this figure from  
241 its legend. Even more, there are many trees labelled with the same A, B, C,.... and we do not  
242 know which tree represents which haplotype, etc. I also do not know what to conclude from  
243 figure 50, i.e. the legend does not help me to understand the message from line 355-357.

244 **Response:** *Thank you for this valuable comments!*

245 *We apologize for our mistakes! We have revised all legends of the figures and Supplementary*  
246 *figures to ensure that they are sufficiently informative.*

247 *For Supplementary Figure 16, we provide tree topologies of banteng and gaur fragments across*  
248 *species belonging to the bovine species to confirm banteng and gaur introgression.*

249 *For Supplementary Figure 17, we have revised the figure legend in order to explain that it*  
250 *provides a geographic contour map of banteng/gaur introgression proportions in 16 East Asian*  
251 *indicine (EAI) breeds. The proportions of banteng and gaur introgressions were calculated by*  
252 *RFMix. The proportions of each breed were plotted according to its geographic origin and*  
253 *visualized using the ArcMap component of the ArcGIS software suite. EAI cattle in the*  
254 *southeastern coastal region of China show the highest level of banteng and gaur ancestries. We*  
255 *also modified the legends of Supplemental figure 50 (now is Supplementary Fig. 29) in order to*  
256 *explain how the geography with three large rivers in a mountainous regions impede the gene*  
257 *flow between SEAI and SWCI.*

258

259 **[Comment of Reviewer #1]**

260 Line 414: (in brackets)???

261 **Response:** *Thank you for this specific comment! We have deleted "(in brackets)".*

262

263 **[Comment of Reviewer #1]**

264 Line 447-458: Two recent and comprehensive studies on paternal and maternal haplogroups in  
265 cattle could be helpful here (DOI: 10.1111/eva.13315 and doi: 10.1111/age.13104).

266 **Response:** *Thank you for drawing our attention to these interesting papers on the diversity of*  
267 *mitochondrial and Y-chromosomal variations in cattle. We now refer the first paper on taurine*  
268 *mtDNA in line 124. Since the second paper of Escoufflaire et al. (2021) described Y-*  
269 *chromosomal variation in French taurine cattle, we do not refer it due to its irrelevance to our*  
270 *analyses.*

271

272 **[Comment of Reviewer #1]**

273 Line 459-470: This can be understood to mean that East Asia was a land without cattle, so that

274 Bos indicus spread with the single matriline I1a in this empty area. This was also the case with  
275 the spread of domestic sheep in Europe. However, for sheep, there is archaeological evidence  
276 for a sheep-less Europe before the Neolithic. Do you have any evidence that East Asia was a  
277 cattle-less region before the spread of Bos indicus? Africa was not cattle-less either, and as a  
278 result of paternal introgression we only observe haplogroup T. Please clarify.

279 **Response:** Thank you for this thought-provoking comment! In fact, East China harbored taurine  
280 cattle prior to the arrival of indicine DNA (Feliuss et al., 2014, doi:10.3390/d6040705; Zhang  
281 et al., 2018; doi.org/10.1186/s12863-018-0705-9). Approximately 20% of South Chinese cattle  
282 still contain taurine mtDNA with high diversity (Gao et al., DOI:10.1038/s41598-017-16438-  
283 7; Xia et al., 2018; doi: 10.1111/age.12749). This is now indicated in the text as follows:  
284 “Indicine cattle may have entered East Asia between 3,500 and 2,500 YBP well after the arrival  
285 of taurine cattle (ref. 10, Feliuss et al., 2014, doi:10.3390/d6040705; Zhang et al., 2018;  
286 doi.org/10.1186/s12863-018-0705-9; Gao et al., doi:10.1038/s41598-017-16438-7; Xia et al.,  
287 2018; doi: 10.1111/age.12749)”.

288

289 **[Comment of Reviewer #1]**

290 Line 470-475: The reason behind this could be lack of sampled population along the inland  
291 trading routes from South to East Asia. Therefore, the integrated genetic analyses as mentioned  
292 in the paper may have difficulty supporting inland trading even if this is correct.

293 **Response:** Thank you for this valuable comment!

294 We have revised our conclusion along this point as follows: “but our combined uniparental and  
295 autosomal data support a coastal route for the first migration wave to Southeast Asia as the  
296 main entry point of indicine cattle into East Asia”.

297 This is also supported by the geographic situation with the Himalayan Mountain range as well  
298 as the rivers and mountainous areas in Southwest China, which does not favor an inland  
299 migration of cattle (Supplemental Figure 39).

300

301 **[Comment of Reviewer #1]**

302 Line 558-559, “Treemix and Dsuite...”: Dsuite is a tool and not any method, please clarify this.

303 **Response:** Thank you for this specific comment! We have revised this sentence to include  
304 TreeMix and the D statistic.

305

306 **[Comment of Reviewer #1]**

307 Supplementary table 1:

308 If possible, the country of origin should also be mentioned, also verify that breeds with Name  
309 “SriLanka” exists.

310 **Response:** Thank you for this specific comment! We have added the countries of origins to  
311 Supplementary Table 1 and added more information for all breeds. We have added the local  
312 name of Sri Lankan cattle.

313

314 **[Comment of Reviewer #1]**

315 Supplementary table 2:

316 Haryana is declared as an Indian breed and the sample used here was sequenced in Chen et al.  
317 2018 and should be from India. We know that India is very restrictive when it comes to foreign  
318 use of biological resources. There is no Indian collaborator in Chen et al. 2018, so I do not see  
319 any legal way to analyze Indian biological material outside India or without an Indian  
320 collaborator. Was this Haryana cattle sampled in India or elsewhere? Please clarify and correct  
321 if necessary in Supplementary Table 2.

322 ***Response:** Thank you for this specific concern! Dr. Daniel G Bradley was a collaborator in*  
323 *Chen et al. 2018 and provided with Indian samples of Haryana, Sahiwal, and Tharparkar. These*  
324 *animals have been in his collection since the early 1990s, and they were sampled at the Indian*  
325 *Veterinary Research Institute, Izatnagar-243122, District Bareilly, Uttar Pradesh, India. The*  
326 *first paper including these samples (Anim Genet. 1994; 25(4): 265-71. doi: 10.1111/j.1365-*  
327 *2052.1994.tb00203.x.) did have a collaborator, D S Balain, from India.*

328

329 **Reviewer #2 (Remarks to the Author):**

330 **[Comment of Reviewer #2]**

331 This manuscript is interesting and provides data from a unique sample of individuals that had  
332 not been previously characterized. Overall, I find the manuscript well written, although it  
333 appears to have been done in parts by different groups of individuals with different writing  
334 styles and slightly different nomenclature. This is inevitable with a project of this size. I would  
335 encourage the corresponding authors to go through the entire manuscript to make it more  
336 uniform. I do have a number of concerns related to the details that were presented, or not  
337 presented, that make a final determination not possible at this time. I always start my reviews  
338 with the materials and methods but since there was such a substantial amount of information in  
339 the supplemental information, I will start there. Unfortunately, the supplemental document does  
340 not have line nor page numbers, so I'll quote specific lines.

341

342 **[Comment of Reviewer #2]**

343 Whole-genome resequencing

344 Additional detailed information on the mapping rate and sequencing depth are provided in  
345 Supplementary Table 1” In Sup. Table 1 you use the SRR\* ID as the sample. This is incorrect  
346 because these are run IDs. You should use the BioSample ID. I downloaded this table and  
347 compared these SRR to the NCBI database and you have two duplicate samples. SRR2016752  
348 and SRR2016754 are the same SAMN3387026 individual. With only a single duplicate, it is  
349 unlikely that any of the results would have been significantly affected. However, this table needs  
350 to be corrected to present the BioSample and if data reanalysis is performed, one of these two  
351 should be removed.

352 ***Response:** Thank you for your careful review! We have removed SRR2016752 and reanalyzed*

353 *the results. We also provided the BioSample ID for all samples in Supplementary Table 1 and*  
354 *removed one duplicated sample.*

355

356 **[Comment of Reviewer #2]**

357 Population genomic analyses Genetic diversity

358 “Runs of homozygosity (ROH) were identified using the --homozyg option implemented in  
359 PLINK v.1.9, which slides a window of 50 SNPs (--homozyg-window-snp 50) across the  
360 genome.” This is a very small window considering the density of markers. It is well recognized  
361 that results are sensitive to settings for this analysis (see [https://doi.org/10.1186/s12864-020-](https://doi.org/10.1186/s12864-020-6463-x)  
362 [6463-x](https://doi.org/10.1186/s12864-020-6463-x)). I question whether or not the settings used were appropriate. Specifically, by using too  
363 small of a window size and other inappropriate settings, far too many ROH are detected.  
364 Evidence of this can be seen in Supplementary Fig. 2 where there are a significant number of  
365 samples that have estimated ROH totaling greater than 1/3 of the genome and a large number  
366 of samples with ROH greater than half the genome. This is unrealistic. This analysis needs to  
367 be redone with appropriate settings, which may need to be determined empirically given the  
368 data. It would also be useful at this time to examine any correlation  
369 between average genome coverage and number/length of ROH as one would predict that lower  
370 coverage samples will have heterozygous sites undercalled which may manifest as ROH when  
371 in fact there are not ROH if heterozygous positions were called accurately.

372 **Response:** *Thank you for these valuable concern and comment!*

373 *We reanalyzed the ROHs. We first filtered samples with the mapping depth < 10 × or 3 × genome*  
374 *coverage < 90% and used 331 individuals for ROH analysis. We then used imputed SNPs to*  
375 *detect ROHs with a minimum length of 100 kb and containing at least 50 SNPs using PLINK*  
376 *v1.9 software. Additionally, three heterozygous SNPs were allowed per ROH.*

377 *First, the effect of scanning window size (--homozyg-window-snp) was investigated by*  
378 *varying this setting from 10 to 200 SNPs (step size of 10 SNPs). The other parameters were set*  
379 *to a minimum density threshold (50 SNPs), a large gap (1000 kb), a minimum length (50 kb), a*  
380 *maximum number heterozygous SNPs in a scanning window (3), and a scanning window*  
381 *threshold level (0.05). The results suggested that increasing scanning window size led to the*  
382 *decrease in both number and total length of the estimated ROHs (Fig. 1), however, there are*  
383 *still too many ROH; When the scanning window size was 100 and 150 Mb, the largest numbers*  
384 *of ROHs were 7914 and 6735, respectively.*

385



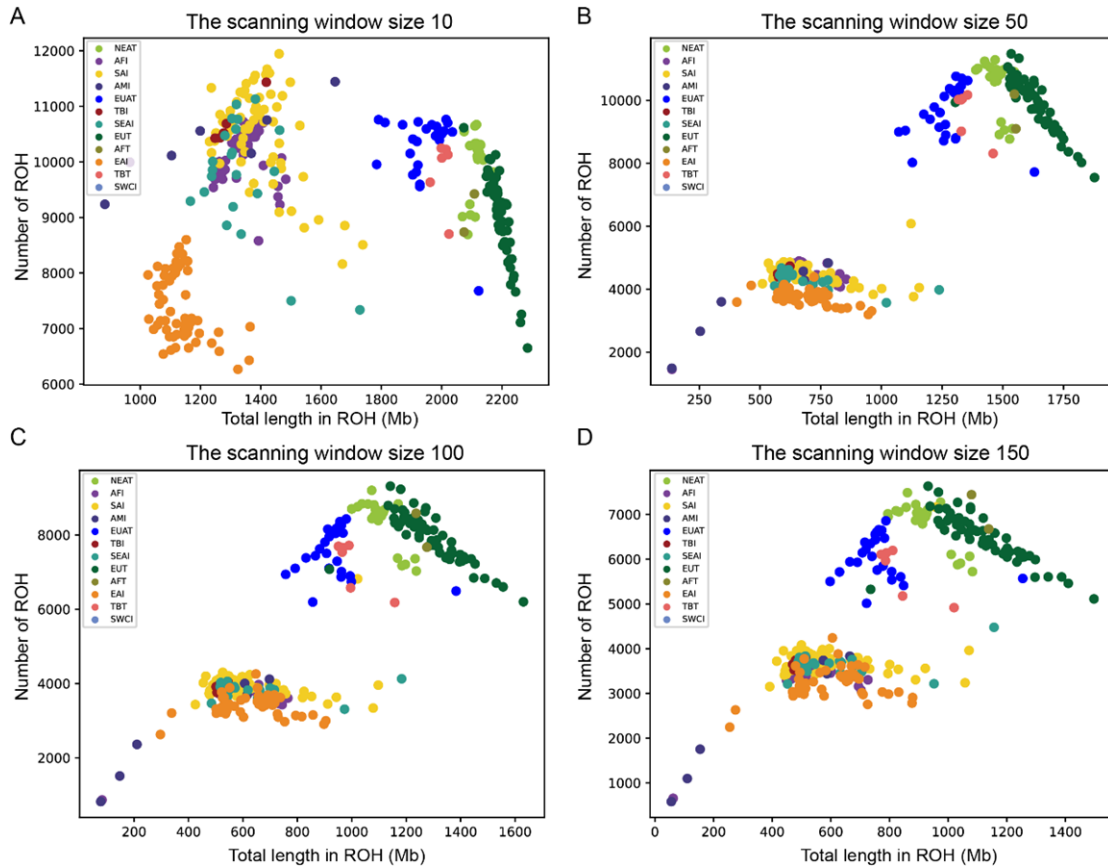

386  
 387  
 388  
 389  
 390  
 391  
 392  
 393  
 394  
 395  
 396

Fig. 1 Relationship between the number of runs of homozygosity (ROHs) and the total length (Mb) of ROHs for all individuals from each cattle geographic group. Each dot represents an individual.

*Therefore, we have increased the --homozyg-kb parameter (minimum length set to 100 Mb) to filter the small ROHs. The other parameters were set to a minimum density threshold (50 SNPs), a large gap (1000 kb), a maximum number heterozygous SNPs in scanning window (3) and a scanning window threshold level (0.05). The results show that our settings get the expected number (maximum number is 4570) and total length (maximum length is 1,423,160 Mb) of ROHs, which are consistent with the results of Kim et al. (Kim et al. 2020). We used these results in the Supplementary Fig. 2. And these results shows that the level of inbreeding measured by ROHs was lower in indicine cattle than in taurine cattle.*

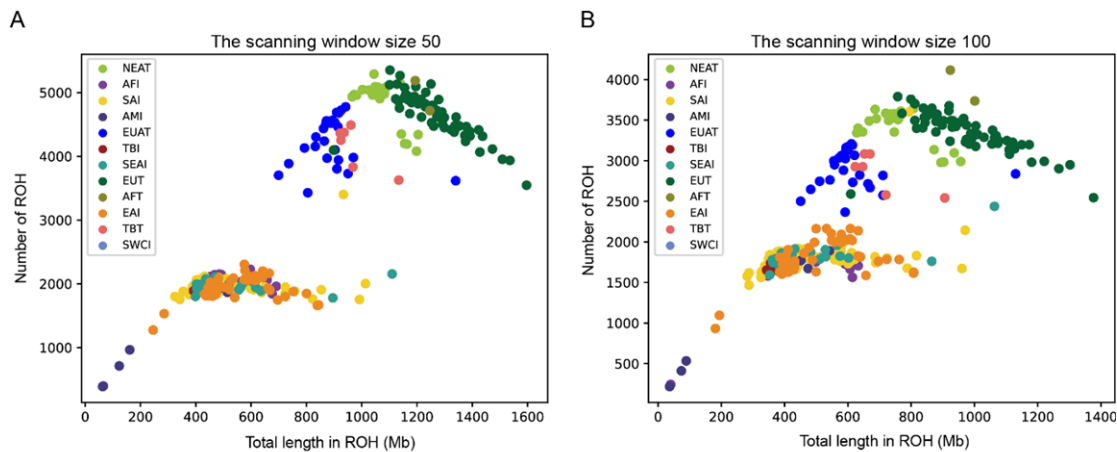

397  
 398

Fig. 2 Runs of homozygosity (ROHs) patterns of all individuals from each cattle geographic groups. (A) the

399 scanning window size is 50 SNPs. (B) the scanning window size is 100 SNPs. The minimum ROH length  
400 was set to 100 Kb for excluding short ROHs.

401 *According to your suggestions, we introduced genomic coverage as an indication of the*  
402 *validity of the ROH analysis (Meyermans et al. 2020). The scanning window size setting (--*  
403 *homozyg-window-snp) was investigated by varying this setting from 10 to 200 SNPs (step size*  
404 *of 10 SNPs). The unchanged parameter set to a minimum density threshold (50 SNPs), a large*  
405 *gap (1000 kb), a minimum length (50 kb), a maximum number heterozygous SNPs in scanning*  
406 *window (3) and a scanning window threshold level (0.05). Consequently, genome coverage was*  
407 *higher than 99% for all breeds, which means that the given settings allowed ROH detection for*  
408 *more than 99% of all autosomes (Fig. 3).*

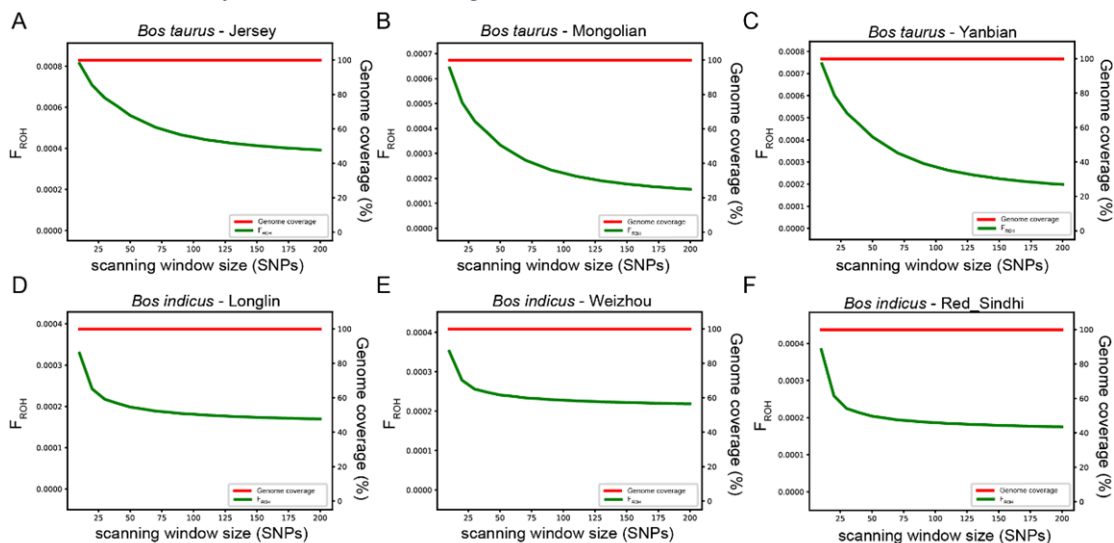

409  
410 Fig. 3 The effect the scanning window size on  $F_{ROH}$  (green) and genome coverage (red) estimates for six  
411 breed/populations. (A to C) three taurine cattle breeds (Jersey, Mongolian, and Yanbian). (D to F) three  
412 indicine cattle breeds (Longlin, Weizhou, and Red Sindhi).

413  
414 **[Comment of Reviewer #2:]**

415 Principal component analysis (PCA)

416 “We removed “all LD” using...” First, please rephrase this. You did not remove “all LD”. I have  
417 the same objection here to the parameters used. First, this is a very small window and probably  
418 left a significant number of loci with  $r^2 > 0.20$  which are more than 50kb apart. Given  
419 everything that we know regarding LD in bovine genomes, you should empirically find the  
420 appropriate setting for this analysis to achieve the desired thinning. This does not have to be  
421 done genome-wide and one could simply use 10Mb from any autosome to estimate what the  
422 appropriate parameters should be. My recommendation would be to use chr25 since we know  
423 there are no assembly issues. For a 10Mb region, calculate \*all\* the pairwise LD values using  
424 ‘-r2 yes really’ and examine the distribution of these values. This figure can be included in the  
425 supplement to provide justification for the settings chosen. As the manuscript is currently  
426 written, the settings are arbitrary and likely impacted the results and interpretation.

427 **Response:** Thank you for this suggestion!

428 *According to your suggestions, we have calculated the LD decay of the cattle genome, and we*

429 provided these results in Supplementary Fig. 4. The half value of LD decay ( $r^2$ ) is 0.11, so we  
430 performed LD-based pruning for the genotype data using PLINK v1.9 with '-indep-pairwise 50  
431 10 0.1'.

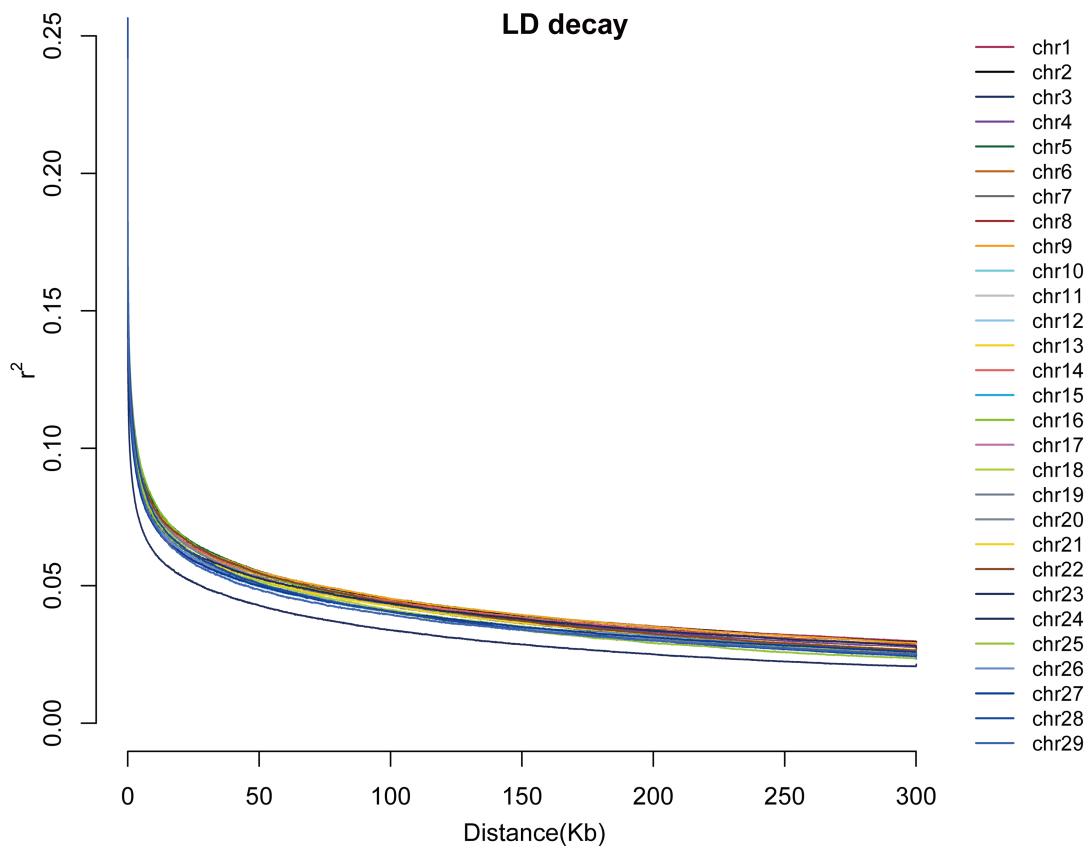

432  
433 *Supplementary Fig. 4 Linkage disequilibrium (LD) decay in 29 autosomes of all 495 cattle. The*  
434 *half value of LD decay is 0.13.*

435  
436 *For PCA and admixture analysis, we used the '-indep-pairwise 50 10 0.1' and '-indep-pairwise*  
437 *20 10 0.1' options to perform LD based pruning for the genotype data and used these data for*  
438 *PCA and admixture analysis to compare the influence of different parameters on PCA and*  
439 *admixture analysis (Supplementary Fig. 5).*

440 *Using these data, the results of PCA and admixture were similar. Therefore, we selected the '-*  
441 *indep-pairwise 50 10 0.1' option for **LD pruning**.*

442



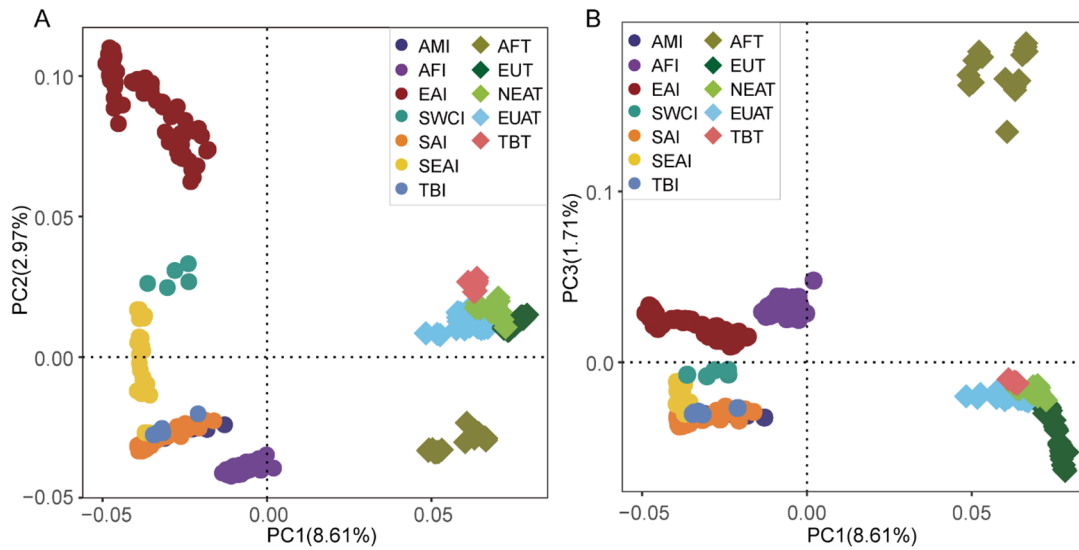

443

444 **Supplementary Fig. 5** Principal component analysis (PCA) of all 495 cattle, illustrated by PC1  
 445 against PC2 (A) and PC1 against PC3 (B). A total of 2,996,368 LD pruned SNPs were used for  
 446 PCA with the parameter ‘-indep-pairwise 50 10 0.1’.

447

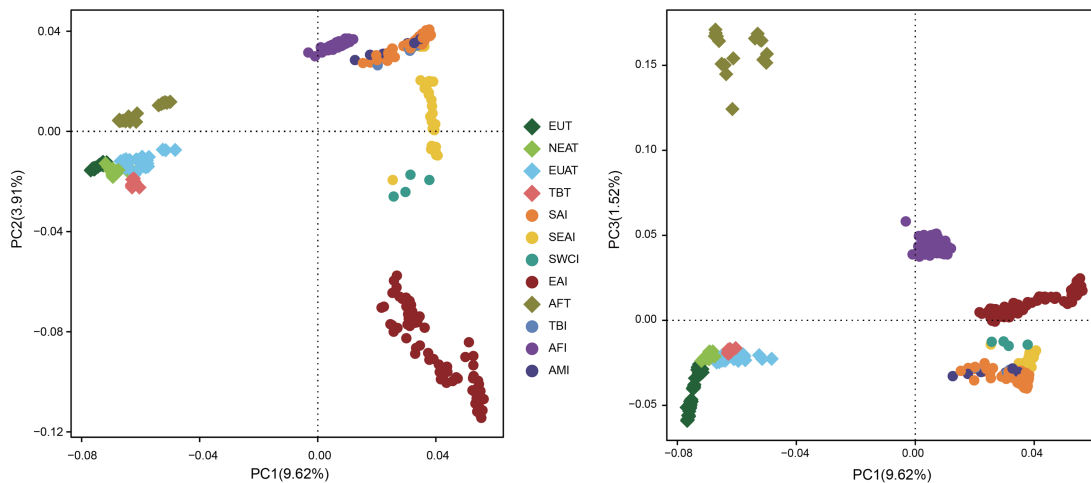

448

449 **Supplementary Fig. 5** Principal component analysis (PCA) of all 495 cattle, illustrated by PC1  
 450 against PC2 and PC1 against PC3. A total of 7,192,063 LD pruned SNPs were used for PCA  
 451 with the parameter ‘-indep-pairwise 20 10 0.1’.

452

453 **[Comment of Reviewer #2:]**

454 “PCA was performed on the genome-wide unlinked SNP dataset...” Please change the word  
 455 “unlinked” throughout the manuscript. You do not have any unlinked variants. Perhaps use “LD  
 456 pruned” as a replacement.

457 **Response:** Thank you for this specific suggestion! We used “LD pruned” to replace “unlinked”  
 458 throughout this revised version of our manuscript.

459

460 **[Comment of Reviewer #2]**

461 Structure analysis

462 "...200 bootstrap replicates were performed..." Why 200? Why not 10, or 10,000. Is the default  
463 of 200 appropriate for your data? "...used to determine the optimal ancestry number..." Exactly  
464 how did you determine the optimal number? There is quite a bit of literature on this, but nothing  
465 was stated or cited.

466 **Response:** *Thank you for this valuable comment!*

467 *We reanalyzed the population genetic structure in Admixture using new data, and we used the*  
468 *default setting, so bootstrap replicates were not used. We used the delta K method to choose the*  
469 *optimal K, and we added the K values to the Supplementary Table 4. And a sentence is added*  
470 *as follows:*

471 *"ADMIXTURE v.1.3.0 was used to quantify genome-wide admixture among cattle*  
472 *breeds/populations<sup>82</sup> and run for each possible group number (K = 2 to 8), where K is the*  
473 *assumed number of ancestral populations. The delta K method was used to choose the optimal*  
474 *K<sup>82</sup>".*

475 **[Comment of Reviewer #2]**

476 Neighbor-joining (NJ) and maximum likelihood (ML) phylogenetic trees

477 "...A window size of 1,000 SNPs was used to account for linkage disequilibrium..." This  
478 should be unnecessary if you properly LD pruned in the first place. This brings up another issue  
479 I have with the manuscript. You have many different analyses and it is difficult to tell exactly  
480 which set of loci you are using for which analysis. In this section, it appears that you are using  
481 the "raw" 67M variants. However, it seems to me that if the objective is to "identify closely  
482 related individuals" then the LD pruned dataset from the PCA section would be appropriate.  
483 However, it appears that these two analyses used different filtering. My recommendation would  
484 be to provide a supplemental table that lists the major analyses performed and exactly which  
485 data manipulations were done for each analysis. Since data manipulations may impact one  
486 analysis but not another, it would be helpful to the reader to understand exactly what was done  
487 and which analyses used the same loci.

488 Furthermore, you can specify the total number of loci in this table for each dataset.

489 **Response:** *Thank you for this valuable suggestion!*

490 *We apologize for the misleading description. We have clarified the datasets used for NJ tree*  
491 *and ML trees as follows: "To identify relationships among individual cattle, a total of*  
492 *67,162,108 autosomal SNPs were used to construct a NJ tree with PLINK v.1.9 based on the*  
493 *matrix of pairwise genetic distances<sup>6</sup> (Fig. 1). FigTree v.1.4.3 10 was used to visualize the NJ*  
494 *tree. Then, we inferred a population-level phylogeny using the ML approach implemented in*  
495 *TreeMix<sup>11</sup>. We performed LD-based pruning for the genotype data of all 495 cattle and one yak*  
496 *using the --indep-pairwise 50 5 0.1 option of PLINK v.1.9<sup>6</sup>. A total of 15,228,801 LD pruned*  
497 *SNPs and the "-global -root yak" parameter were used to generate the ML tree (Supplementary*  
498 *Fig. 8)." We have summarized all information on datasets used for different analyses in the*  
499 *Supplementary Table 3.*

500

501 **[Comment of Reviewer #2]**

502 Detection of selection signatures shared by all indicine populations  
503 "...were calculated for 50-kb windows with a 20 kb step across the autosomes..." Line 907 of  
504 the main manuscript says that a 100kb window was used, which is it? I have issues with what  
505 is specified here. Typically, these types of analyses are performed where the window size is an  
506 integer multiple of the step size. For instance 25 kb step and 50 kb window or 20kb step and  
507 100kb window. This needs to be addressed throughout the manuscript and I would recommend  
508 using the same parameters for all analyses that use this type of setting (where appropriate). This  
509 will make comparisons between analyses much easier.

510 **Response:** *Thank you for this valuable comment!*

511 *We apologize for the mistakes. Population genetic differentiation ( $F_{ST}$ ) was calculated using a*  
512 *sliding window approach with windows of 50 kb and a step size of 20 kb.*

513 *For Line 907 (now Line 825), there was a typo in our manuscript: the text should indicate 50*  
514 *kb and a step size of 20 kb.*

515 *According to your suggestion, we have checked our methods. For  $F_{ST}$ , the  $\theta\pi$  ratio (indicine/*  
516 *taurine),  $F_{ST}$ , XP-EHH, and PBS, we used 50 kb and a step size of 20 kb. For U20 and U50*  
517 *analyses, we reanalyzed the data and used a 50 kb window and a step size of 20 kb too.*

518

519 **[Comment of Reviewer #2]**

520 "...these windows harbored 117 candidate genes in indicine cattle..." I don't think these 117  
521 genes are specific to indicine cattle and you can probably just say cattle. By saying indicine  
522 cattle here one might think you are implying that these are not in taurine cattle, which isn't the  
523 case.

524 **Response:** *Thank you for this specific suggestion! We have corrected this sentence and deleted*  
525 *the reference to indicine cattle. The sentence is revised as follows: "These windows harbored*  
526 *117 candidate genes."*

527

528 **[Comment of Reviewer #2]**

529 "...the expression levels of these 117 candidate genes were validated in nine different tissues  
530 of taurine and indicine cattle." I'm not sure exactly what you are validating? The fact that there  
531 are RNA-seq data in those tissues for these annotated genes simply validates that the annotation  
532 is correct.

533 **Response:** *Thank you for this valuable comment! To avoid misleading results, we have deleted*  
534 *this part from the manuscript.*

535

536 **[Comment of Reviewer #2]**

537 "Candidate genes under selection were defined as those overlapped by sweep regions or within  
538 20 kb of the signals." 20kb seems arbitrary. What justification do you have for choosing 20kb?  
539 Why not 50kb, or 10 kb or simply require the gene to fall within the sweep region and not allow  
540 any overlap. It seems to me that allowing for a gene to be outside your sweep region, by some  
541 arbitrary distance, speaks to your confidence in defining the boundaries of sweep regions. Some

542 justification should be given for whatever value you choose.

543 **Response:** *Thank you for this valuable comment!*

544 *We apologize for the misleading description around this topic. In fact, the candidate genes were*  
545 *taken from the selected regions identified with the three methods, without extending the signal*  
546 *by 20 kb. This sentence has been revised as follows: “The candidate genes selected in all*  
547 *indicine cattle were defined as the genes with overlapped signals in any two of the three*  
548 *selection methods ( $\theta\pi$  ratio (indicine/taurine),  $F_{ST}$ , and XP-EHH)”.*

549

550 **[Comment of Reviewer #2]**

551 “...were plotted using a 10-kb sliding window...” Again, arbitrary. Why not use the same  
552 window size for plotting that you used for detection?

553 **Response:** *Thank you for this specific suggestion!*

554 *The window shows three small regions (Supplementary Figs. 10-12). The region sizes are 0.67*  
555 *Mb, 8.21 Mb, and 0.33 Mb. For the definition of sliding window, we tried different sizes. If we*  
556 *use the detection window (50 kb), there are too few SNPs to draw the graph, and the real signal*  
557 *for the target region will be overlooked.*

558

559 **[Comment of Reviewer #2]**

560 Detection of selection signatures in SAI, EAI, and AFI lineages“...windows of 50 kb and a step  
561 of 20 kb...” Same comment on windows.

562 **Response:** *Thank you for this specific comment!*

563 *All the methods used to detect selection signatures were based on calculations using a 50 kb*  
564 *window with a 20 kb step size across the autosomes, including CLR,  $F_{ST}$ , and XP-EHH.*

565

566 **[Comment of Reviewer #2]**

567 “...the overlap windows of P values less than 0.005 (Z test) of each method were considered  
568 candidate signatures of selection...” Why 0.005? Again, some justification is warranted. It  
569 seems to me that you have an extraordinarily large number of windows that were tested which  
570 implies that some adjustment needs to be considered for multiple testing. Appropriately  
571 accounting for multiple testing here could significantly change the detected regions which in  
572 turn could significantly impact all downstream inference based on these results. As written, it  
573 is impossible to determine exactly what was done and what impact it may have on the results  
574 or interpretation.

575 **Response:** *Thank you for this kind concern!*

576 *P values were estimated based on Z-transformed values using the standard normal distribution*  
577 *and were further corrected by multiple testing using the Benjamin-Hochberg false discovery*  
578 *rate (FDR) method. We hope this justified.*

579

580 **[Comment of Reviewer #2]**

581 “Only pathways or annotations with a Bonferroni-corrected  $P < 10^{-2}$  were retained

582 (Supplementary Tables 7-10).” This should probably be written as  $P < 0.01$  to be consistent  
583 throughout the manuscript.

584 *Response: Thank you for this specific comment. We have revised  $P < 10^{-2}$  to  $P < 0.01$*   
585 *throughout the manuscript.*

586

587 **[Comment of Reviewer #2]**

588 Introgression analysis

589 “Phylogenetic analyses of these segments confirmed the banteng or gaur introgression into  
590 specific EAI individuals.” Exactly how does this \*confirm\* introgression? “Therefore, we used  
591 the statistic U20SAI, EAI, banteng (1%, 20%, and 100%) 20, which was equal to the number  
592 of SNPs within a genomic window where a particular allele was fixed at a frequency of 100%  
593 in banteng but at a frequency less than 1% in SAI cattle or greater than 20% in EAI cattle.” For  
594 both the banteng and gaur analyses you only have two individuals of each species. This means  
595 that you have essentially no ability to estimate allele frequencies in gaur and banteng. This  
596 means that all of your results from analyses of this type are suspect, which in turn means that  
597 inference based on these results is suspect. There are more than two of each of these publicly  
598 available in SRA and your analysis would be significantly strengthened by using what is  
599 available to increase your sample size, which will allow you to better estimate allele frequencies  
600 in these species.

601 *Response: Thank you for this valuable suggestion!*

602 *The phylogeny of specific genes provided evidence for introgression (Fig. 5D, Suppl. Figs. 16*  
603 *to 27) and support that introgressed segments of East Asian haplotypes were clustered within*  
604 *bangteng or gaur haplotype groups. According to your and reviewer 1’s suggestions, we have*  
605 *added six banteng samples and three gaur samples, and we recalculated the U20 and U50*  
606 *statistics. We have added the number of whole genome sequences used for each species as*  
607 *follows in the revised version: “We also used sequencing data of 22 whole genomes from six*  
608 *other bovine species, including two bison, two wisent, five gaur, eight banteng, two yak, and*  
609 *two water buffaloes, as outgroups or for introgression analysis.”*

610

611 **[Comment of Reviewer #2]**

612 Paternal analysis “...(i) only present in at least two males but not in females; (ii) hemizygous...”  
613 Are these not represented as homozygous in the actual data? In reality, the males are  
614 hemizygous but they are represented as homozygous when variant calling.

615 *Response: Thank you for this valuable comment! We apologize for our misleading description.*  
616 *We have revised the text. In fact, no Y-SNP is heterozygous. This sentence has been revised as*  
617 *follows: “Only the SNPs called in the MSY region that met the following criteria were retained:*  
618 *(1) present in at least two males but not in females and (2) no heterozygous site.”*

619

620 **[Comment of Reviewer #2]**

621 “BEAGLE was used to impute missing alleles.” Were samples set to homozygous for  
622 imputation and you simply pretended as if this was an autosome? Exactly how was Beagle run

623 for Y-specific loci? The underlying model includes recombination rate, which is zero for the Y.  
624 It's unclear to me how this was performed.

625 ***Response:** Thank you for this concern! In our study, we imputed missing alleles under the*  
626 *assumption that they may be belonged to autosomes. In this study, we used imputed data only*  
627 *to construct a median-joining (MJ) network. To avoid misleading results, we reconstructed the*  
628 *network using unimputed data. We deleted this imputation-related part to avoid misleading.*

629

630 **[Comment of Reviewer #2]**

631 Whole mitogenome phylogeny

632 "...samples with a depth of coverage lower than 100× were disregarded." Why? The depth of  
633 coverage on the MT is a function of the overall average genome coverage and the tissue source  
634 for the DNA. This biases the analysis against samples that were sourced from semen. A more  
635 appropriate threshold would be to look at the average coverage of the MT relative to the average  
636 of the autosomes. What you will find is that tissue sourced from semen will have similar MT  
637 coverage to the autosomes while tissue sourced from anything other than semen will have  
638 exceedingly high MT coverage. Regardless of coverage, you can assemble the MT reads from  
639 all of the samples and then perform an evaluation of MT genome completeness versus coverage  
640 and set some (non-arbitrary) threshold for what samples you use for downstream analysis. In  
641 summary, I think you may be leaving information on the table by setting this arbitrary threshold.

642 ***Response:** Thank you for this valuable comment!*

643 *You are correct: this biases the analysis against samples that were sourced from semen, as*  
644 *semen will have MT coverage similar to that of the autosomes, which will not be sufficient to*  
645 *assemble full mitogenomes. We apologize for our unclear description. We used stricter criteria*  
646 *for mitogenomes, and we have revised and supplemented our methods.*

647 *In this study, we focused only on individuals for which mitogenomes could be assembled. We*  
648 *first selected all indicine cattle in our dataset for mitogenome analysis, and then we selected*  
649 *only mitogenomes that were successfully assembled by MIA software and filtered mitogenomes*  
650 *with a gap length > 1 bp. According to these criteria, we compared our results with those of a*  
651 *previous study. We used more criteria, and an additional 13 samples were filtered. A total of*  
652 *329 mitogenomes assembled in this study and 18 reference mitogenomes were used for the final*  
653 *analysis. We reanalyzed all mitogenomes in the manuscript. The results were similar to our*  
654 *previous results.*

655

656 **[Comment of Reviewer #2]**

657 Estimation of effective population size and divergence time

658 It is unclear which variants were used and how the phasing was done. Both of these details need  
659 to be fully documented since both impact the downstream analysis.

660 ***Response:** Thank you for this concern!*

661 *We have added more information for the estimation of effective population size and divergence*  
662 *time.*



663 *The section is rewritten as follows: “The multiple sequential coalescent Markovian model 2*  
664 *(MSMC2) method was used to model the population history of the three core indicine groups*  
665 *(EAI, SAI, and AFI) and to infer historical changes in their effective population size and*  
666 *population separation. We applied this method to all groups with two deep-coverage (>14 ×)*  
667 *individuals per group. All sample sets of filtered variant calls were used for imputation and*  
668 *phasing using Beagle v4.1 with default parameters 4, except for “niterations” which was set to*  
669 *10. For each individual, DR2 value in INFO column of the “phase.vcf” file was used to filter*  
670 *SNPs, and SNPs with DR2 > 0.9 were retained. We also applied the genome mask as*  
671 *recommended in the documentation of the software. For the calculation of effective population*  
672 *size, the parameter of MSMC2 was set to “msmc2 -t 10 -p 1\*2+25\*1+1\*2 -I 0,1,2,3” and*  
673 *“msmc2 -t 10 -p 1\*2+25\*1+1\*2 -I 4,5,6,7”. For the calculation of population separation, the*  
674 *parameter of MSMC2 was set to “msmc2 -t 8 -P 0,0,0,1,1,1,1 -s -p 1\*2+25\*1+1\*2”. For*  
675 *effective population size inference, two individuals (4 phased haplotypes) from each population*  
676 *were used. The time scale in generation time at  $g = 6$  and a mutation rate per generation at  $\mu g$*   
677 *=  $1.26 \times 10^{-8}$  were used.”*

678

679 **[Comment of Reviewer #2]**

680 Supplementary Fig. 4 & 5

681 This shows the results and the percentages for the first and second PCs are very small, especially  
682 given the number of samples. Supplemental Fig 5A shows that the percentages get even smaller  
683 when PCA is performed on the indicine samples only. This data should be better filtered to get  
684 a more informative PCA. This raises further questions related to my comments under the PCA  
685 section. I’m not convinced that this was done properly and therefore the results and  
686 interpretation are suspect.

687 **Response:** *Thank you for this valuable comment! According to your suggestions, we have*  
688 *performed PCA again using new LD pruned data with the parameters “-indep-pairwise 50 10*  
689 *0.1”. The new results are shown in Supplementary Figs. 4 and 5.*

690

691 **[Comment of Reviewer #2]**

692 Main manuscript which I’ll just refer to line numbers.

693 L102 Change disposal to dispersal.

694 **Response:** *Thank you for this specific correction! We have corrected “disposal” to “dispersal”.*

695

696 **[Comment of Reviewer #2]**

697 Line 182 Fig.2. Personally, I hate these figures. They look pretty but show nothing of  
698 substantive value because of the resolution (genome coordinates). It is up to the authors as to  
699 whether to include it but I feel that it is a waste of space.

700 **Response:** *Thank you for this concern! We have deleted Fig. 2 in the main text and moved it to*  
701 *the Supplementary Fig. 9.*

702

703 **[Comment of Reviewer #2]**

704 L182-183 It is unclear why this is important or even relevant. Differentially expressed genes  
705 implies that a regulatory variant has been selected differently between the two groups of animals.  
706 However, a coding region variant may have been selected differently between the two groups  
707 and not change expression levels. What if you would have selected a different set of tissues?  
708 My point is that this analysis does nothing to further define what may be the underlying cause  
709 of the region to be differentially selected between the two groups (assuming the region truly is  
710 a selection target) and simply adds noise to the discussion. I would argue that this same  
711 observation could be made for a large number of regions randomly selected from the genome.  
712 However, without quantifying this, you are making a lot of assumptions to relate gene  
713 expression differences to putative selection regions.

714 *Response: Thank you for this concern! Accordingly, we have removed this section.*

715

716 **[Comment of Reviewer #2]**

717 L185 It appears to me that this is actually two regions. In fact, you list it as two regions but you  
718 describe it as a single region. This needs to be reconciled.

719 *Response: Thank you for this correction!*

720 *We have revised this sentence as follows: "The top selection signatures are in two regions on*  
721 *BTA7, both together spanning 4.46 megabases (Mb) (43.04-44.67 and 50.14-52.97 Mb)."*

722

723 **[Comment of Reviewer #2]**

724 L192-198 All of this is speculation. While I am not opposed to some level of speculation, I am  
725 opposed to adaptive storytelling. If you truly identified a functionally plausible gene, and you  
726 believe your underlying sequence data, then you should be able to identify a plausible candidate  
727 mutation (or mutations) to explain your data. If you are going to state this, then why not do the  
728 follow-up analyses to try to identify the actual mutation(s)? I believe a deep dive into this would  
729 be far more valuable than what was done.

730 *Response: Thank you for this valuable comment! We agree that our statements are at best*  
731 *tentative, and we have adapted our text as follows:*

732 *"Seven of the other 75 genes located in the topmost significant sweeps are functionally*  
733 *associated with heart development, blood circulation, DNA damage, and light response.*  
734 *Further research is warranted to test their roles in heat adaptation or other differences between*  
735 *indicine and taurine cattle."*

736

737 **[Comment of Reviewer #2]**

738 L242-243 The SEMA3F Val650Ala variant appears to be 22:50162746 which is at frequency  
739 0.033 in the 1000 Bulls Run9 data and is at frequency of 0.034 in my own UMAG1 data based  
740 on ~5500 samples. There are a lot of other protein altering variants in this gene, this just happens



741 to be one of them. It is unclear how you arrived at this particular variant. I think the manuscript  
742 would be significantly improved if the authors tried to dissect some of these and do a more  
743 thorough analysis rather than simply list gene names.

744 ***Response:** Thank you for this valuable comment! We have deleted this part from the manuscript.*

745

746 **[Comment of Reviewer #2]**

747 L262-265 I previously listed my concerns with this analysis. Adding to this, for almost all other  
748 analyses you used sliding windows. However, here you state that you used non-overlapping  
749 windows, why?

750 ***Response:** Thank you for this valuable inquiry! To be consistent with the window and step sizes  
751 of other methods, we used the same standards (50 kb window and 20 kb step size) for  
752 recalculation in the revised manuscript.*

753

754 **[Comment of Reviewer #2]**

755 L267 Sup. Figs 18-21. For Supp. Fig 19 has banteng in one part but gaur in the other. This needs  
756 fixed. For supp Fig 18 & 19, this looks like a lot of random noise to me and I suspect it has  
757 something to do with the banteng/gaur N=2 issue. Were consecutive windows merged? The size  
758 of these regions should be informative for the timing of the introgression but nothing was  
759 mentioned about this. I suspect due to the previous issues I've already raised.

760 ***Response:** Thank you for this valuable comment!*

761 *We have fixed the mistake in the Supplementary Fig. 19 legend (now Supplementary Fig. 18).*

762 *We reanalyzed the U20 and U50 statistics using increased sample sizes of eight banteng and  
763 five gaur samples, and we merged consecutive windows. As we used only the results of the U20  
764 statistic, we plotted only adaptive introgressed regions with higher frequencies; please see the  
765 results.*

766

767 **[Comment of Reviewer #2]**

768 For supp Fig 20 & 21, how was a p-value calculated? I could not find this.

769 ***Response:** Thank you for this valuable comment! P values were estimated based on Z-  
770 transformed values using the standard normal distribution and were further corrected by  
771 multiple testing using the Benjamin-Hochberg false discovery rate (FDR) method. We have  
772 added this information to the manuscript.*

773

774 **[Comment of Reviewer #2]**

775 L281 Exactly how does this provide validation?

776 ***Response:** Thank you for this inquiry! We apologize that we did not describe this clearly.*

777 *We used phylogenetic analysis to support the introgression from banteng or gaur into East  
778 Asian indicine cattle. Phylogenetic analyses of haplotypes representing banteng, East Asian  
779 indicine cattle, and other bovine species clustered East Asian indicine cattle with banteng or*

780 *gaur*, thus confirming *banteng* or *gaur* introgression into the East Asian indicine genomes.

781

782 **[Comment of Reviewer #2]**

783 L292-294 What is the call rate for these 11 loci in the raw data? Can you rule out any effect  
784 imputation may have had in this region? This is the most compelling evidence shown thus far.  
785 I would recommend a deeper dive in this region to try to further strengthen your inference.

786 **Response:** *Thank you for this inquiry!*

787 *The call rate of 80 East Asian indicine cattle for these 11 loci in the raw data is in the table,*  
788 *and the missing rate is 0.01 to 0.21.*

789 *Table 1 The call rate for 11 loci in 80 East Asian indicine cattle*

| <i>Chromosome</i> | <i>Position</i> | <i>Alleles</i> | <i>Number of missing alleles</i> | <i>Missing rate</i> |
|-------------------|-----------------|----------------|----------------------------------|---------------------|
| 25                | 216559          | 160            | 0                                | 0                   |
| 25                | 216571          | 160            | 0                                | 0                   |
| 25                | 216581          | 160            | 0                                | 0                   |
| 25                | 216850          | 160            | 16                               | 0.1                 |
| 25                | 219613          | 160            | 2                                | 0.0125              |
| 25                | 219625          | 160            | 4                                | 0.025               |
| 25                | 219635          | 160            | 10                               | 0.0625              |
| 25                | 222783          | 160            | 0                                | 0                   |
| 25                | 222849          | 160            | 0                                | 0                   |

790

791 **[Comment of Reviewer #2]**

792 L318 Supp Fig 45 legend says 2 panels but there is only 1. Fig 46 shows  $N_e$  increasing in recent  
793 times which is contrary to everything we know about cattle demography. Perhaps this relates to  
794 my next point.

795 **Response:** *Thank you for this valuable observation! We have deleted the description of panel B*  
796 *in Supplementary Fig. 45 (now Supplementary Fig. 33). For Supplementary Fig. 46 (now*  
797 *Supplementary Fig. 36 ), demographic increases in the population size of indicine cattle can be*  
798 *associated with postdomestication expansion, as observed in other domesticated species, and*  
799 *with a more recent diffusion of *I1a* within East Asia.*

800

801 **[Comment of Reviewer #2]**

802 L325-344 This paragraph leads off with MSMC but it is unclear to me how you can use the Y  
803 and MT in an MSMC analysis when the underlying model is based on recombination?

804 **Response:** *Thank you for kind inquiry!*

805 *The Bayesian skyline plots (BSPs) of mtDNA and Y chromosome data were generated using*  
806 *BEAST v2.6.0, as reported in the Methods section. We have specified this at the beginning of*  
807 *the paragraph to avoid misunderstanding: “Using an empirical Bayesian approach with*  
808 *BEAST v2.6.0, we detected...”.*

809

810 **[Comment of Reviewer #2]**

811 L402-446 This is all speculation. Again, some is useful but this is 1.5 pages. I would recommend  
812 that a deeper dive into any one or two of these would be more valuable to the reader than  
813 speculating on all of them.

814 ***Response:** Thank you for this valuable comment! We have revised this part and reduced  
815 speculation. We agree that this text is too detailed for a discussion of our tentative results. It  
816 has been condensed to 17 lines. We also made the preceding part of the Discussion more to the  
817 point.*

818

819 **[Comment of Reviewer #2]**

820 L439-440 Proposes that EAI cattle may have introgression from a Bos-like ghost species as an  
821 explanation for hemoglobin-related genes. Since hybridization and introgression from known  
822 Bos species is difficult, and these large numbers of divergent sequences appear in only this  
823 family of genes, is it possible that this 'ghost' group is a lost population of EAI-like Indicine  
824 cattle, or that these mutations were specific to the extant EAI clade without any introgression?

825 ***Response:** Thank you for this valuable comment! We believe that the phylogenetic position of  
826 the 'ghost' species is not compatible with an EAI origin but instead indicates a sister species of  
827 gaur. We also used an ancient kouprey genome (2× coverage) and gayal genomes to genotype  
828 this region. The polygenetic tree showed that EAI was influenced not only by banteng and gaur  
829 but by gayal and extinct kouprey species as well. Considering the low coverage of kouprey and  
830 the hybrid ancestry of gayal, we did not analyze the gene flow between these two species and  
831 EAI further.*

832

833 **[Comment of Reviewer #2]**

834 Methods

835 L491-493 were duplicate reads marked or removed? The 1000 Bulls spec is for them to be  
836 marked. I just want to be sure that what is stated is what was actually done. Along those lines,  
837 the spec has indel realignment and BQSR but that is not stated in the manuscript. Please  
838 accurately specify what was actually done.

839 ***Response:** Thank you for this valuable comment!*

840 *We apologize for the misleading description. We have rewritten the methods. We used BQSR to  
841 map reads and we did not use indel realignment. We have revised the method in the manuscript.*

842 *We generated genotype data following the 1000 Bull Genomes Project Run 8 guideline  
843 (<http://www.1000bullgenomes.com/>) (Supplementary Note 1). We removed low-quality bases  
844 and artifact sequences using Trimmomatic v.0.39, and all clean reads were mapped to the cattle  
845 reference assembly (ARS-UCD1.2) and Btau\_5.0.1 Y BWA-MEM (v.0.7.13-r1126) with default  
846 parameters<sup>1</sup>. We then used SAMtools v.1.9 to sort bam files. For the mapped reads, potential  
847 PCR duplicates were identified using 'MarkDuplicates' of Picard v.2.20.2*

848 (<http://broadinstitute.github.io/picard>). ‘BaseRecalibrator’ and ‘PrintReads’ of the Genome  
849 Analysis Toolkit (GATK, v.3.8-1-0-gf15c1c3ef)<sup>2</sup> were used to perform base quality score  
850 recalibration (BQSR) with the known variant file (ARSI.2PlusY\_BQSR\_v3.vcf.gz) provided by  
851 the 1000 Bull Genomes Project.

852 For SNP calling, we created GVCF files using ‘HaplotypeCaller’ in GATK with the ‘-ERC  
853 GVCF’ option. We called SNPs from combined GVCF files using ‘GenotypeGVCFs’ and  
854 ‘SelectVariants’, respectively. To avoid possible false-positive calls, we used VariantFiltration  
855 as recommended: (1) SNP clusters with ‘-clusterSize 3’ and ‘-clusterWindowSize 10’ options;  
856 (2) SNPs with mean depth (for all samples)  $< 1/3\times$  and  $> 3\times$  ( $\times$ , overall mean sequencing  
857 depth across all samples); (3) quality by depth,  $QD < 2$ ; (4) phred-scaled variant quality score,  
858  $QUAL < 30$ ; (5) strand odds ratio,  $SOR > 3$ ; (6) Fisher strand,  $FS > 60$ ; (7) mapping quality,  
859  $MQ < 40$ ; (8) mapping quality rank sum test,  $MQRankSum < -12.5$ ; and (9) read position rank  
860 sum test,  $ReadPosRankSum < -8$  were filtered. We then filtered out nonbiallelic SNPs and SNPs  
861 with missing genotype rates  $> 0.1$ . The whole genome sequencing data from six other bovine  
862 species were mapped in the same way. We used the 67,162,108 SNPs as a reference list to  
863 genotype the combined set of 495 cattle samples and 22 samples of six other bovine species,  
864 resulting in 67,145,163 SNP data with wild species data. The two final SNPs genotyping  
865 datasets were imputed and phased using BEAGLE v.4.0<sup>3</sup> with default parameters and filtered  
866 by  $DR2 < 0.9$  (Supplementary Table 3). The remaining SNPs were annotated according to their  
867 positions using SnpEff v.4.3<sup>4</sup>. We also summarized samples and SNPs used for different  
868 analyses in Supplementary Table 3.

869

870 **[Comment of Reviewer #2]**

871 L494 “...depth (for all individuals)  $> 1/3\times$  and  $< 3\times$ ...” I have no idea what this represents,  
872 please clarify.

873 **Response:** Thank you for the inquiry! We have corrected this sentence as follows “SNPs with  
874 mean sequencing depth (over all samples)  $< 1/3\times$  and  $> 3\times$  ( $\times$ , overall mean sequencing depth  
875 across all samples) were removed”.

876

877 **[Comment of Reviewer #2]**

878 L500 Please specify BEAGLE parameters that were used. If defaults were used, then state that.  
879 Additionally, you specify SNPs here, were only SNPs used or did you also use indels. Please  
880 specify. Did you make any attempt to evaluate the accuracy of imputation? If so, you should  
881 state that. If not, I would encourage you to evaluate this and include this information in any  
882 filtering that you perform.

883 **Response:** Thank you for this valuable comment! We used only SNPs and default parameters

884 of BEAGLE v.4.0 for imputation. We also detected accuracy according to DR2. In this version,  
885 we filtered sites with  $DR2 < 0.9$ , resulting in a total of 65,336,403 SNPs (Supplementary Table  
886 3).

887

888 **[Comment of Reviewer #2]**

889 L502 This is based on an annotation version, in which case you should specify the exact file or  
890 annotation version that was used to make it reproducible.

891 **Response:** Thank you for your advice. We specify that we used annotation version RefSeq  
892 assembly GCF\_002263795.1 for autosome annotation and RefSeq assembly  
893 GCF\_000003205.7 for Y chromosome annotation.

894

895 **[Comment of Reviewer #2]**

896 L547 I've already discussed the multiple testing issue and choice of  $p < 0.005$ .

897 **Response:** Thank you for the valuable comments.

898 *P* values were estimated based on Z-transformed values using the standard normal distribution  
899 and were further corrected by multiple testing using the Benjamin-Hochberg false discovery  
900 rate (FDR) method.

901

902 **[Comment of Reviewer #2]**

903 L557 Introgression analyses... How might a MAF threshold of 0.01 filtering affected these  
904 analyses?

905 **Response:** Thank you for kind inquiry! We tried using the MAF threshold, but it reduced the  
906 detection of rare alleles of wild bovine species.

907

908 **[Comment of Reviewer #2]**

909 L573 Same comment about the GTF version.

910 **Response:** Thank you for the valuable comments.

911 We specify that we used RefSeq assembly GCF\_002263795.1 for autosome annotation and  
912 RefSeq assembly GCF\_000003205.7 for Y chromosome annotation.

913

914 **[Comment of Reviewer #2]**

915 L583 Already commented on the Y chromosome imputation.

916 **Response:** Thank you for this valuable comment! We have revised this part in the current  
917 version of manuscript.

918

919 **[Comment of Reviewer #2]**

920 Figure 3 panels B-C and D-E appear to be switched relative to the legend. 10kb sliding window  
921 appears to be different than what is described in the M&M.

922 **Response:** Thank you for this valuable observation! We have corrected the panels in Fig. 3.

## REVIEWER COMMENTS

### Reviewer #1 (Remarks to the Author):

#### General comments

The main message of this manuscript is that East Asian Indicine (EAI) cattle are descended from pure Indicine cattle originating in the South Asian core area (i.e. SAI, Indus Valley). Following the introduction of these pure Indicine animals via coastal routes, rapid and successful adaptation to hot and humid environments occurred through introgression of Banteng and/or Gaur genes. The age of introduction of the pure Indicine cattle to the new environment is estimated to be about 3000 years, i.e. 600 generations of cattle. That mean the first contact to and the introgression of Banteng and/or Gaur should be about 600 generations ago or younger. These results are supported by cumulative evidence from different analyses.

Adaptive introgression is a very important evolutionary mechanism, but currently it is becoming more popular and many signals are interpreted as introgression, often without an alternative hypothesis.

My main comments in the first report were about the quality of the reference groups, which are important for the above mentioned main message of this manuscript. I asked questions like:

- 1) Do the authors ensure that the SAIs are pure indicines without a genomic taurine segment?
- 2) Do the authors ensure that the Banteng samples are pure and do not contain a genomic segment from indicine or taurine cattle?
- 3) Do the authors ensure that the Gaur samples are pure and do not contain a genomic segment from indicine or taurine cattle?

In his rebuttal letter, the authors state that this is ensured, but there are some inconsistencies that worry me, and these inconsistencies are the main problem with this response.

As already mentioned by Reviewer #2 (first comment on the first submission), in a project of this magnitude it is inevitable that the material will be analysed by different groups of authors and that the results will also be described and interpreted by different groups of

authors. Therefore, Reviewer #2 asks the corresponding authors to go through the entire manuscript in order to make it more consistent.

In my opinion, this has not yet been done. I am even more disturbed by the fact that not possibly all analyses were carried out with the same material. Just a few examples:

- 1) Supplementary Table 1 lists 514 samples, but at the beginning of the Results section, lines 139-145, the authors mentioned 517 samples (297+198+22=517).
- 2) Eight Banteng are mentioned in the main text, but only five are listed in Table S1.
- 3) Table S11 lists eight banteng, but only B1, B2 and B3 are identical to Table S1. Banteng like banteng08, banteng09, banteng\_ypt2224, banteng\_ypt2225, banteng\_ypt2230 are not described in the main material (Table S1).
- 4) Heading of the important table S11 is wrong (source group twice).
- 5) Cross-reference to Table S11 is wrong (see Supplementary Note 4 line 365).
- 6) Supplementary Note 4 mentions gaur04, but there is no gaur04 in Table S1.
- 7) Supplementary Note 4 mentions 40 core and pure Indicine cattle, but in Table S1 (last column) we find only 20 Indicine cattle. Table S11 mentions 17 pure SAI animals. Most probably we should add Sha3b, Thar1 and Har03 to this list and thus get 20 again and not 40. The Response to my first comment also mentions 40 Core and pure Indicine cattle.
- 8) Table S1 and Figure S7 do not use the same sorting. Therefore, the reader cannot assign the results of the Admixture analysis to a particular Biosample ID.

These are just inconsistencies I spotted because I was particularly interested in the use of pure reference panels in the introgression analyses. I am not in a position, and it is not my job, to check all the cross-references and all the figures, but from the above I get the impression that the authors do not consider Reviewer #2's first comment. The authors do not address it either.

With respect to ADMIXTURE, TreeMix, D- and f3-statistics.

All these analyses are performed at the genome or even population level, which does not necessarily indicate the purity of the animal at the locus level. The analyses that check for possible admixture at the locus/segment level are more appropriate. This is particularly important for the Banteng and Gaur reference population.

As mentioned in this paper (<https://www.nature.com/articles/s41467-018-05257-7>),

factors like large difference in the number of individuals sampled per breed, genetic drift in the population can affect its ancestry composition. Similarly, post-admixture drift can also distort the signals of  $f_3$ -statistics; this is also mentioned by the authors themselves in the legend of Table S11. Further, in the description of  $f_3$ -statistics (supplementary note 4), the authors incorrectly mentioned the threshold of Z-score as 3; for the test to be significant the Z-score of  $f_3$ -tests should be less than -3. Next,  $f_3$ -test is better suited to group of animals (increases the power of test) rather than performing on each individual separately. I would also recommend the authors to perform  $f_3$ -tests on each SAI cattle breed as target with Banteng as P1 (one of the source population) and Zebu as P2 (another source population) to check the sensitivity of this test.

Methods used to identify signature of selection such as composite likelihood ratio (CLR) and iHS has increased power if the information about derived alleles is used. Since the authors have already aligned Gaur, Banteng, Bison, Wisent, Yak and Buffalo to the cattle assembly, they could have easily ascertain the ancestral alleles. Therefore, I am curious as to why the authors decided not to use ancestral allele information for this analysis. Further, the authors have used the results of Tajima's D to support their signature of selection analysis, however, in some cases (for instance, Fig 2 and 3), it is hardly negative. Usually, the significance of Tajima's D, whether or not the obtained value significantly deviates from 0, is obtained using beta distribution (table 2, of original Tajima's D paper). Therefore, I suggest that the authors either remove the results of Tajima's D or justify it.

Further, parameters used in D-statistics are not described in sufficient details. Please include it in Table S3 too.

There are 84 introgressed and then positively selected genes in 42 candidate regions (line 274, U50). These are validated by phylogenetic analysis. Supplementary Figures 20-26 show the phylogenetic analysis of 27 of these regions. All these phylogenetic trees indicate complete fixation of the introgressed segment. The authors show that EAI cattle are descended from pure SAI cattle, but in the 27 regions presented here, not a single EAI haplotype clustered with its native group of origin. Such 100% turnover could be expected for one or two strongly positively selected segments, but I would not expect this for all 27 segments shown in Figures S20-S26.

In what demographic scenario would such a 100% turnover be expected for 27 segments



presented?

How strong must positive selection be to observe the phylogenetic trees shown in Figures S20-S26?

In all 27 trees, EUT and SAI haplotypes form monophyletic groups, and these are paraphyletic with respect to EAI, and there is not a single EAI haplotype that cluster with its origin group SAI. Could the Funder effect cause the observed patterns?

In the main text (lines 279-288), the positively selected segment in the proximal region of BTA25 is presented and discussed (fig. S26 and fig. 4). According to this, EAI animals in most of the EAI subpopulations studied carry the native SAI haplotype with a frequency of >0.5. The haplotypes of presumed Banteng and Gaur origin show only an increased frequency. In my opinion, this strongly contradicts the phylogeny shown in Supplementary Figure 26, where no EAI haplotype was clustered with SAI.

In addition to Banteng and Gaur, the authors implicate Kouprey, Gayal (data origin not given) and some phantom species as explanations for the observed diversity in the proximal segment of BTA25. The authors should at least try to discuss an explanation other than the implausible and complicated multi-species introgression and subsequent positive selection? If I remember correctly, the globin gene family, and in particular the  $\alpha$ -globin chain, is known for a complicated evolution of paralogous genes, including recurrent mutations, gene conversion, co-evolution of different family members, and so on. Authors should check if complicated evolution of paralogues gene families could affect their conclusions.

Figure S24 shows three chromosomal segments on BTA18. All three are located in the most complex region of the *Bos taurus* and *Bos indicus* genomes (see <https://doi.org/10.3168/jemandes2021-21625>). The segmental duplication behaves similarly to the gene families mentioned above, and the region on BTA18 is very difficult to reconstruct correctly. The authors should check whether segmental duplication (in general) could influence their conclusions.

Other minor comments

Line 76-77, the authors write ...“was a direct consequence of a small number of genomic regions.” While it is conceivable that introgressed segments in EAI cattle did provide adaptive advantage, this statement is too strong especially considering that authors themselves have identified genomic segments under selection that were not introgressed

from its wild relatives. Selection based on standing genetic variation should at least be discussed as a possibility. Further, authors should consider removing the phrase “direct consequence” as the authors did not provide any evidences showing direct and strong causality between introgressed segments and adaptation in EAI cattle.

Line 113, “..where have large local population are found” This sentence appears to be grammatically incorrect, please rephrase it.

Line 205, section, “Ancestral environmental adaptation of...” ◇ The authors should at least provide a sentence or two to give readers some information about the methods applied to identify signature of selection in this section. I am emphasizing this because when I started reading this section I was under the impression that the same set of methods were applied here as applied in the previous section, i.e. Fst, theta and XP-EHH, but it was not until the end of this section that it was mention that a different set of methods were applied, i.e. CLR and iHS. Moreover, the naming of the sections are also confusing, “the ancestral adaptation of indicine cattle”, “Ancestral environmental adaptation of south Asian indicine cattle”, “the indicine adaptation to the tropical, humid environment”. Ideally, signature of selection analysis should be performed without a priori expectation because it is very difficult to conclusively link the identified genes under selection with the breed characteristics; usually, it is done by functional genomics and by studying the literature extensively. Therefore, such naming of the sections is suitable to discussion but not to result section.

### **Reviewer #2 (Remarks to the Author):**

Overall, the manuscript has improved significantly. I appreciate the author’s willingness to make changes and incorporate suggestions. There are three documents as I see it, the main manuscript, the supplement and the response to previous review, all of which are lengthy. I have comments for each, which I’ll address individually, but the most pressing issue relates to the ROH analysis under Supplementary Note 2: Genetic diversity. I’ll start there because I think this needs addressed.

Response L358-400 and supplement L273-280. I still do not believe your ROH analysis is accurate. Even with your new analysis, you show a large number of individuals with a total genome length contained within ROH to be >1 Gb, or over a third of the genome. That is

simply not realistic. There has been a large amount of prior literature on the subject, largely from SNP-chip data, and all of them show the “extreme” samples having under 1 Gb in ROH. I believe this [1] is an informative publication.

[1] <https://bmcmgenomdata.biomedcentral.com/articles/10.1186/1471-2156-13-70>

I believe Figure 5 from [1] is particularly useful in that it shows the same trend you are seeing in your data but the scale is quite different. This is particularly important because if the current manuscript is published it will present conflicting values because I believe you are including far too much of the genome in ROH. It is generally accepted that these types of ROH analysis are measuring recent inbreeding, which you acknowledge on L160 of the manuscript, where the size of ROH regions is proportional to the inbreeding coefficient. As the size of a ROH decreases you are estimating IBD further back in time. This may be appropriate in some cases, even perhaps the current manuscript, but your ability to differentiate old IBD regions from random chance or other population forces requires increased samples sizes, which you do not have. As I said, on it's face, I do not believe your ROH results. The question is, what is causing them to be elevated? In order to try to figure this out, I extracted 187 samples from your study that are also present within my UMAG1 call set, which is based on ~5500 genomes and VQSR. For these 187 samples, I extracted two sets of variants, A) all bi-allelic SNPs that passed VQSR and B) the positions contained on the Illumina Bovine HD and GGPF250 genotyping assays in order to compare with the results from [1].

A) “bcftools view --threads \$CPU -f PASS -m2 -M2 -v snps -S \$InputSamples --force-samples -Ob -o \$c.\$Prefix.bcf \$InputBcf”

B) “bcftools view --threads \$CPU -R \$c.variants2get.list --trim-alt-alleles -Ob -o \$c.\$Prefix.bcf \$InputBcf”

Dataset A produced 125M variants for these 187 samples.

bcftools +counts ChenAll.bcf

Number of samples: 187

Number of SNPs: 125813861

Number of INDELS: 0

Number of MNPs: 0

Number of others: 0

Number of sites: 125813861

Dataset B produced ~850K variants.

```
bcftools view -S chen_sample.list --force-samples ChenChip.bcf -Ou | bcftools +counts
```

Number of samples: 187

Number of SNPs: 850772

Number of INDELS: 64337

Number of MNPs: 0

Number of others: 0

Number of sites: 897036

The bcf files were then converted to plink bed/bim/bam:

```
plink --bcf ChenAll.bcf --const-fid 0 --chr-set 29 --allow-extra-chr --out ChenAll
```

```
plink --bcf ChenChip.bcf --const-fid 0 --chr-set 29 --allow-extra-chr --out ChenChip
```

Finally, the ROH analysis was performed using various parameter values.

The first run used the values specified on L279-280 of main paper and L389-396 of Response. I will refer to this as “ChenParameters”.

```
plink --bfile ChenAll --chr-set 29 --chr 1-29 --homozyg --homozyg-gap 1000 --homozyg-kb 100 --homozyg-snp 50 --homozyg-window-het 3 --homozyg-window-snp 50 --homozyg-window-threshold 0.05 --out ChenAll
```

The second run was the same as above but changed --homozyg-window-het 3 to 1. I refer to this as Chen1het.

The third run was the same as above but changed --homozyg-window-het 3 --> 1, --homozyg-snp 50 --> 200 --homozyg-window-snp 50 --> 100 --homozyg-snp 50 --> 200. I refer to this as ChenStrict.

The loci from the SNP-chips were run the same as the second analysis above which used the author’s parameters but changed --homozyg-window-het 3 --> 1. I refer to this as Chip1het. All of the results from the \*.hom.indiv plink files were copied into Excel and visualized. See

file ChenROHsubmitted.xlsx which should be available with this review. It is clear from Figure 1 that I was able to recreate the trend that is shown in Supp. Figures 2 & 3 with my “ChenParameters” in blue. As I contend, these parameters still include too many ROH and encompass too much of the genome per individual. The “Chen1het” in orange only change --homozyg-window-het from 3 to 1 which produces values that more closely resemble prior literature and what we know about these populations. Therefore, I believe the root problem with the analyses, as presented, is this parameter. In hindsight, this makes sense as this parameter is meant to allow for genotyping error. By setting this parameter to 3 and requiring only 100 loci within a window, I believe you are effectively saying that you have little confidence in your genotype calls because you are allowing 3 errors (3% error rate) to still call a region as homozygous. If you are confident in your genotype calls, and new mutations are negligible (which I think is true here) then a value of 1 is more appropriate and in fact yields results closer to expectations. In order to more fully explore this, I also created a more strict dataset (ChenStrict) which required more loci while still maintaining 1 het position (grey). In order to provide a direct comparison to snp-chip data I also present the same as “Chip1het” in red. As you can see, the “Chip1het” is comparable to prior literature from using these assays. My final interpretation of these data is that the parameters used in the revision are still not appropriate, the main parameter to change is --homozyg-window-het and the correct values for the other parameters are somewhere between what was used and the “strict” values that I used. This is a fairly trivial analysis that the authors should perform and update the manuscript.

As before, I will provide comments on the Supplement by referring to SL as supplement line number.

SL261-264: “The whole genome sequencing data from six other bovine species were mapped in the same way. We used the 67,162,108 SNPs as a reference list to genotype the combined set of 495 cattle samples and 22 samples of six other bovine species, resulting in 67,145,163 SNP data with wild species data.”

It is unclear to me what you mean by “...as a referencelist...”? My initial interpretation of this is that you added additional samples, called genotypes on those additional samples, and then just extracted the 67M positions from the prior variant call set. Is this correct? The proper way to perform this analysis would be to recall genotypes from *\*all\** of your samples

starting with the combined GVCFs from SL253. This confusion is exacerbated by the third description in Supp. Table 3 which says “A total of 64,475,272 SNPs called from all 495 cattle and 22 genomes from other six bovine species.” Please clarify exactly what you did here.

SL266 Supplementary Table 3 This table is very informative and helpful to the reader and this reviewer. However, now that I have this table, it presents new problems. For the second line of this table where it says “Imputed data of...” I assume this represents the phasing and imputation that you did with Beagle, correct? If so, please add the word “phased” to this description. This is a very important point later.

None of these numbers seem to add up, going back to my comment directly above. It seems to me that the proper way to analyze all of these data is to do joint genotyping on all samples simultaneously, which would be your 514 samples presented in Supp. Table 1. (Note that the second line of this table, and in the manuscript and supplement you refer to 495+22 which is 517 but you only have 514 in Table1.) This will result in a total number of variants N. All analyses performed after this will involve some level of filtering or selection of loci but they all will go back to this original N variants. As it stands, this table helped clear up some issues but it presented more. For example the 6th description in the number of samples column, “All 495 cattle and one yak”. Table 1 lists 3 yak while SL237 says two yak. Table 1 has 5 banteng while SL237 says eight. Figure 4 (F) of the main manuscript mentions Kouprey but I do not see any in table 1 as Kouprey or Bos sauveli. Where did this sample come from? Again, many of these numbers are not consistent.

SL285 and 300 The PCA and admixture analysis used -indep-pairwise 50 10 0.1 while the NJ and ML phylogeny used --indep-pairwise 50 5 0.1. Why would you use different parameters for two different analyses to achieve the same objective of minimizing LD between the variants you use? By using different parameter sets you effectively make a direct comparison of these two analyses impossible because you changed the loci that you are using.

SL312 “...XP-EHH score using selscan v.1.1 with default settings.” Selscan software did not have the ability to use unphased data until v2.0. Therefore, I assume that you are relying on the Beagle phased and imputed data for these analyses, is that correct? If so, this is why it is

important to add the word phased to Supp. Table 1 because without doing the phasing in Beagle you could not have used selscan v.1.1.1.

SL329 "... using SweepFinder2."

From the manual, it appears that this requires a recombination rate file. What did you use as the recombination rate between loci? My assumption is that you assumed a constant recombination rate of 1 cM/Mb since you do not actually have a recombination map. If that is the case, please state that in the manuscript. This software also requires a "B-value" for each variant. Where did you get these values from?

SL354: Why were EAI grouped into a single population without looking into recent specific breed introgression as the potential source of admixed genotypes? Often times the direction of admixture events is difficult to estimate. Is the signal of introgression the result of the modern banteng/gaur samples having some amount of domestic cattle introgression in their genomes?

SL360-S365: The f3 data does not appear to be presented in Supplementary table 10, There appears to be a numbering issue of tables in the supplementary data document, with a shift of +1 after supplementary table 7.

Main manuscript referring to ML as manuscript line number:

ML 76 "...was a direct consequence of..." That's a fairly strong claim. I think you evidence consistent with a hypothesis but I question whether it represents a direct consequence.

ML113 remove the word have.

ML261 Supp. Figure 16 has multiple pages of figures with the same panel labels but only 1 legend. Please have a look at this as it appears it may have been an error when preparing the files for submission.

ML264-266 "To identify regions in the EAI genomes that were likely under selection, we used a statistic to detect positively selected and introgressed genes (PSIGs)" Are these actually detecting genes or regions? You use both terms in the same sentence.

ML351 Supp. Fig. 38 This is a much better figure than the previous version!

ML512 "...gene transfer format (GTF) (GCF\_002263795.1) file." This is an accession for the genome assembly, it is NOT an accession for a gene set. I assume that you either used annotations from NCBI or Ensembl, both of which have many different versions which are regularly updated. You need to specify which annotations you used (NCBI or Ensembl) and exactly which version of the annotation.



1 **Responses to Reviewers' comments**

2 **[Comment of Reviewer #1]**

3 General comments

4 The main message of this manuscript is that East Asian Indicine (EAI) cattle are descended  
5 from pure Indicine cattle originating in the South Asian core area (i.e. SAI, Indus Valley).  
6 Following the introduction of these pure Indicine animals via coastal routes, rapid and  
7 successful adaptation to hot and humid environments occurred through introgression of  
8 Banteng and/or Gaur genes. The age of introduction of the pure Indicine cattle to the new  
9 environment is estimated to be about 3000 years, i.e. 600 generations of cattle. That mean the  
10 first contact to and the introgression of Banteng and/or Gaur should be about 600 generations  
11 ago or younger. These results are supported by cumulative evidence from different analyses.  
12 Adaptive introgression is a very important evolutionary mechanism, but currently it is  
13 becoming more popular and many signals are interpreted as introgression, often without an  
14 alternative hypothesis.

15 *Response: Yes, we automatically assume adaptive introgression. This is at least partially*  
16 *supported by the GO and KEGG enrichment results but would of course need additional*  
17 *evidence from functional studies.*

18 **[Comment of Reviewer #1]**

19 My main comments in the first report were about the quality of the reference groups, which are  
20 important for the above mentioned main message of this manuscript. I asked questions like:

- 21 1) Do the authors ensure that the SAIs are pure indicines without a genomic taurine segment?  
22 2) Do the authors ensure that the Banteng samples are pure and do not contain a genomic  
23 segment from indicine or taurine cattle?  
24 3) Do the authors ensure that the Gaur samples are pure and do not contain a genomic segment  
25 from indicine or taurine cattle?

26 In his rebuttal letter, the authors state that this is ensured, but there are some inconsistencies  
27 that worry me, and these inconsistencies are the main problem with this response.

28 *Response: Thank you for this valuable comment. Indeed, pure ancestry is never guaranteed for*  
29 *a group of proximate cross-fertile species. However, according to your suggestions, we have*  
30 *checked the D statistics among indicine cattle, taurine cattle, banteng and gaur samples to*  
31 *select pure SAI samples without taurine, banteng or gaur introgression, select pure taurine*  
32 *cattle without SAI cattle, banteng or gaur introgression, and select banteng or gaur without SAI*  
33 *and taurine introgression. Finally, we selected 15 pure SAI cattle, 15 taurine cattle, 4 banteng,*  
34 *and 2 gaur and used them for introgression analysis (Supplementary Table 10 and*  
35 *Supplementary Dataset 1).*

36 *The D statistic was used to select pure SAI cattle, taurine cattle, banteng, and gaur for*  
37 *introgression analysis. For SAI cattle, we used the three tree topologies of D (SAI individual,*  
38 *SAI individual; taurine cattle, buffalo), D (SAI individual, SAI individual; banteng individual,*  
39 *buffalo), and D (SAI individual, SAI individual, gaur, buffalo) to select the SAI samples without*

40 any gene flow from taurine cattle, banteng or gaur. For taurine cattle, we used three tree  
41 topologies of *D* (taurine individual, taurine individual; SAI, buffalo), *D* (taurine individual,  
42 taurine individual; banteng individual, buffalo), and *D* (taurine individual, taurine individual;  
43 gaur individual, buffalo) to select taurine samples without any gene flow from SAI cattle,  
44 banteng or gaur. For banteng, we used two tree topologies of *D* (banteng individual, banteng  
45 individual; SAI individual, buffalo) and *D* (banteng individual, banteng individual; taurine  
46 individual, buffalo) to select banteng samples without any gene flow from taurine or SAI cattle.  
47 For gaur, we used two tree topologies of *D* (gaur individual, gaur individual; SAI individual,  
48 buffalo) and *D* (gaur individual, gaur individual; taurine individual, buffalo) to select gaur  
49 samples without any gene flow from taurine or SAI cattle. We used all combinations of  
50 individuals to calculate the *D* statistic. We finally selected a panel of 15 pure SAI cattle, 15  
51 taurine cattle, 4 banteng, and 2 gaur samples with a  $|Z \text{ score}| < 3$  for RFmix analysis, *D* statistic,  
52 *U*<sub>20</sub>, and *U*<sub>50</sub> statistical calculation (Supplementary Data 1).

53 We repeated the analysis of introgression using these samples.

54 **[Comment of Reviewer #1]**

55 As already mentioned by Reviewer #2 (first comment on the first submission), in a project of  
56 this magnitude it is inevitable that the material will be analysed by different groups of authors  
57 and that the results will also be described and interpreted by different groups of authors.  
58 Therefore, Reviewer #2 asks the corresponding authors to go through the entire manuscript in  
59 order to make it more consistent.

60 In my opinion, this has not yet been done. I am even more disturbed by the fact that not possibly  
61 all analyses were carried out with the same material. Just a few examples:

62 1) Supplementary Table 1 lists 514 samples, but at the beginning of the Results section, lines  
63 139-145, the authors mentioned 517 samples (297+198+22=517).

64 **Response:** We apologize for our unclear description. We finally used 517 samples, including  
65 495 cattle genomes and 22 wild bovine species genomes. We also used one gayal and one  
66 ancient kouprey sample for the introgression region analysis of *BTA25*. We added this  
67 information in the Supplementary Note 4.

68 “For the analysis of the introgressed region of *BTA25* (0.21-0.26 Mb), we also used a gayal  
69 sample and an ancient kouprey sample to detect its origin. The coverage of gayal and kouprey  
70 was 17.32× and 1.4×, respectively. Due to the hybrid origin of gayal and low coverage of the  
71 kouprey genome, we did not examine possible introgression of gayal and kouprey. The publicly  
72 available sequences were downloaded from China National GeneBank (CNGB) and the SRA  
73 with the following project accession numbers: CRX165997 (gayal, YD4) and PRJNA764746  
74 (kouprey).” Considering the low coverage of the kouprey genome and the hybrid ancestry of  
75 gayal, we did not further analyze the gene flow between these two species and EAI cattle.

76 **[Comment of Reviewer #1]**

77 2) Eight Banteng are mentioned in the main text, but only five are listed in Table S1.

78 **Response:** We apologize for our unclear description. We included 8 banteng and 5 gaur in our

79 *dataset. According to your comment, we updated Supplementary Table S1 and added all*  
80 *information on the 8 banteng, and we only used 4 banteng and gaur samples in the introgression*  
81 *analysis.*

82 **[Comment of Reviewer #1]**

83 3) Table S11 lists eight banteng, but only B1, B2 and B3 are identical to Table S1. Banteng like  
84 banteng08, banteng09, banteng\_ypt2224, banteng\_ypt2225, banteng\_ypt2230 are not  
85 described in the main material (Table S1).

86 *Response: We apologize for our mistakes. We updated our sample information, and we renamed*  
87 *our samples to ensure that the names are consistent in all materials.*

88 **[Comment of Reviewer #1]**

89 4) Heading of the important table S11 is wrong (source group twice).

90 *Response: Thank you for your valuable comment. We have revised Supplementary Table 11,*  
91 *and we selected pure SAI cattle, taurine cattle, banteng, and gaur for  $f_3$  analysis.*

92 **[Comment of Reviewer #1]**

93 5) Cross-reference to Table S11 is wrong (see Supplementary Note 4 line 365).

94 *Response: We have double-checked the references to the Supplementary Tables 10 and 11.*

95 **[Comment of Reviewer #1]**

96 6) Supplementary Note 4 mentions gaur04, but there is no gaur04 in Table S1.

97 *Response: We have renamed the sample and ensured consistency in all materials.*

98 **[Comment of Reviewer #1]**

99 7) Supplementary Note 4 mentions 40 core and pure Indicine cattle, but in Table S1 (last column)  
100 we find only 20 Indicine cattle. Table S11 mentions 17 pure SAI animals. Most probably we  
101 should add Sha3b, Thar1 and Har03 to this list and thus get 20 again and not 40. The Response  
102 to my first comment also mentions 40 Core and pure Indicine cattle.

103 *Response: We apologize for our mistakes. We finally selected 15 pure indicine cattle, 15 taurine*  
104 *cattle, 4 banteng, and 2 gaur for introgression analysis. According to your suggestions, we have*  
105 *checked the D statistic among indicine, taurine, banteng and gaur samples. We have corrected*  
106 *our mistakes in Supplementary Note 4 and Supplementary Tables 10 and 11.*

107 **[Comment of Reviewer #1]**

108 8) Table S1 and Figure S7 do not use the same sorting. Therefore, the reader cannot assign the  
109 results of the Admixture analysis to a particular Biosample ID.

110 *Response: Thank for your suggestion. We have sorted the samples in Supplementary Table 1*  
111 *and Supplementary Figure 7 to ensure consistency.*

112 These are just inconsistencies I spotted because I was particularly interested in the use of pure  
113 reference panels in the introgression analyses. I am not in a position, and it is not my job, to  
114 check all the cross-references and all the figures, but from the above I get the impression that  
115 the authors do not consider Reviewer #2's first comment. The authors do not address it either.

116 *Response: Thank you for your careful review of the consistency of Supplementary Figures and*  
117 *Tables. We have double checked all figures and tables.*

118 **[Comment of Reviewer #1]**

119 With respect to ADMIXTURE, TreeMix, D- and f<sub>3</sub>-statistics. All these analyses are performed  
120 at the genome or even population level, which does not necessarily indicate the purity of the  
121 animal at the locus level. The analyses that check for possible admixture at the locus/segment  
122 level are more appropriate. This is particularly important for the Banteng and Gaur reference  
123 population.

124 ***Response:** Thank for your suggestions. Accordingly, and to ensure the quality of the reference  
125 groups, we calculated the D statistic and selected 15 pure South Asian indicine (SAI) cattle, 15  
126 taurine cattle, 4 banteng, and 2 gaur for introgression analysis. We agree with your point, and  
127 our results in Supplementary Figs. 20-25 show locus-specific trees, which show if a fragment  
128 introgressed from, for example, banteng has a non-banteng origin.*

129 **[Comment of Reviewer #1]**

130 As mentioned in this paper (<https://www.nature.com/articles/s41467-018-05257-7>), factors like  
131 large difference in the number of individuals sampled per breed, genetic drift in the population  
132 can affect its ancestry composition. Similarly, post-admixture drift can also distort the signals  
133 of f<sub>3</sub>-statistics; this is also mentioned by the authors themselves in the legend of Table S11.  
134 Further, in the description of f<sub>3</sub>-statistics (supplementary note 4), the authors incorrectly  
135 mentioned the threshold of Z-score as 3; for the test to be significant the Z-score of f<sub>3</sub>-tests  
136 should be less than -3. Next, f<sub>3</sub>-test is better suited to group of animals (increases the power of  
137 test) rather than performing on each individual separately. I would also recommend the authors  
138 to perform f<sub>3</sub>-tests on each SAI cattle breed as target with Banteng as P1 (one of the source  
139 population) and Zebu as P2 (another source population) to check the sensitivity of this test.

140 ***Response:** Thank you for your suggestions. We agree that Admixture patterns should be  
141 interpreted with caution. However, our Admixture pattern reproduce the divergence of  
142 geographically separated clusters: European taurine, African taurine, African indicine, South  
143 Asian indicine and East Asian indicine cattle. In addition, to ensure the quality of the reference  
144 groups, we calculated the D statistic and selected 15 pure South Asian indicine (SAI) cattle, 15  
145 taurine cattle, 4 bangteng, and 2 gaur samples. We also calculated f<sub>3</sub> statistics for each SAI  
146 breed as targets with banteng, gaur, taurine, and other SAI breeds. For the f<sub>3</sub> statistic, if the Z  
147 score ( $Z \leq -3.0$ ) is significantly negative, test population C has admixture from both reference  
148 populations A and B. All f<sub>3</sub> statistics were positive, indicating that there was no evidence of  
149 admixture (Supplementary Table 11).*

150 **[Comment of Reviewer #1]**

151 Methods used to identify signature of selection such as composite likelihood ratio (CLR) and  
152 iHS has increased power if the information about derived alleles is used. Since the authors have  
153 already aligned Gaur, Banteng, Bison, Wisent, Yak and Buffalo to the cattle assembly, they  
154 could have easily ascertain the ancestral alleles. Therefore, I am curious as to why the authors  
155 decided not to use ancestral allele information for this analysis.

156 ***Response:***

157 *Thank you for your suggestions. In iHS and CLR computation, information on the ancestral*  
158 *and derived allele state is needed for each SNP. In our analysis, the ancestral allele was defined*  
159 *as the allele fixed in the swamp buffalo that was included in the genotype call set, and the*  
160 *ambiguous SNP was discarded. We also updated the iHS and CLR results in our manuscript.*  
161 *We updated our results and added details in the Methods.*

162 **[Comment of Reviewer #1]**

163 Further, the authors have used the results of Tajima's D to support their signature of selection  
164 analysis, however, in some cases (for instance, Fig 2 and 3), it is hardly negative. Usually, the  
165 significance of Tajima's D, whether or not the obtained value significantly deviates from 0, is  
166 obtained using beta distribution (table 2, of original Tajima's D paper). Therefore, I suggest that  
167 the authors either remove the results of Tajima's D or justify it.

168 Further, parameters used in D-statistics are not described in sufficient details. Please include it  
169 in Table S3 too.

170 ***Response:** Thank you for your comment. We have removed Tajima's D. We also added the*  
171 *parameters used in calculating the D statistic in Supplementary Table 3.*

172 **[Comment of Reviewer #1]**

173 There are 84 introgressed and then positively selected genes in 42 candidate regions (line 274,  
174 U50). These are validated by phylogenetic analysis. Supplementary Figures 20-26 show the  
175 phylogenetic analysis of 27 of these regions. All these phylogenetic trees indicate complete  
176 fixation of the introgressed segment. The authors show that EAI cattle are descended from pure  
177 SAI cattle, but in the 27 regions presented here, not a single EAI haplotype clustered with its  
178 native group of origin. Such 100% turnover could be expected for one or two strongly positively  
179 selected segments, but I would not expect this for all 27 segments shown in Figures S20-S26.  
180 In what demographic scenario would such a 100% turnover be expected for 27 segments  
181 presented? How strong must positive selection be to observe the phylogenetic trees shown in  
182 Figures S20-S26? In all 27 trees, EUT and SAI haplotypes form monophyletic groups, and these  
183 are paraphyletic with respect to EAI, and there is not a single EAI haplotype that cluster with  
184 its origin group SAI. Could the Funder effect cause the observed patterns?

185 ***Response:** Thank you for sharing this concern. We apologize for our unclear description. In*  
186 *our previous revision, we used the same color for indicine or taurine haplotypes. In the indicine*  
187 *group, we did find EAI haplotypes clustered with SAI, but we did not color them.*

188 *In the revised manuscript, we first repeated the U50 analysis, specified the length of the*  
189 *introgressed regions, and used 5 SAI cattle, 5 taurine cattle, 4 banteng, and 2 gaur samples and*  
190 *other wild species samples to construct phylogenetic trees and validate the introgression. We*  
191 *excluded four complex regions, and finally obtained 23 regions. Our results showed that*  
192 *introgressed haplotypes of EAI cattle were clustered with banteng or gaur, while no introgressed*  
193 *haplotypes were clustered with South Asian indicine cattle (Supplementary Figs. 20-25).*

194 **[Comment of Reviewer #1]**

195 In the main text (lines 279-288), the positively selected segment in the proximal region of



196 BTA25 is presented and discussed (fig. S26 and fig. 4). According to this, EAI animals in most  
197 of the EAI subpopulations studied carry the native SAI haplotype with a frequency of >0.5.  
198 The haplotypes of presumed Banteng and Gaur origin show only an increased frequency. In my  
199 opinion, this strongly contradicts the phylogeny shown in Supplementary Figure 26, where no  
200 EAI haplotype was clustered with SAI.

201 ***Response:** Thank you for this concern. We are very sorry that we did not explain this clearly.  
202 We have revised Supplementary Figs.20-26 (new version Figs.20-25), we colored all EAI  
203 haplotypes, and new figures showed that non-introgressed haplotypes of EAI cattle were  
204 clustered with SAI haplotypes. In Supplementary Figs. 20-25, we first specified the length of  
205 the introgressed regions and used 5 pure SAI cattle, 5 taurine cattle, 4 banteng, 2 gaur, 3 yak,  
206 2 bison, 2 wisent, 2 buffalo, and 80 EAI samples to construct phylogenetic trees. Our results  
207 showed that introgressed haplotypes of EAI were clustered with banteng or gaur, while no  
208 introgressed haplotypes were clustered with SAI haplotypes. We also found that some EAI  
209 haplotypes also clustered with taurine cattle, which showed that some EAI also have taurine  
210 ancestry.*

211 *In some regions, a small number of markers may also explain why the position of the bison-  
212 wisent-yak outgroup or gaur-banteng is variable. In some trees, banteng and gaur are  
213 separated. We also checked that the genomic segments were demarcated accurately and  
214 contained only the introgressed fragments. Please see Supplementary Figs. 20-25.*

215 **[Comment of Reviewer #1]**

216 In addition to Banteng and Gaur, the authors implicate Kouprey, Gayal (data origin not given)  
217 and some phantom species as explanations for the observed diversity in the proximal segment  
218 of BTA25. The authors should at least try to discuss an explanation other than the implausible  
219 and complicated multi-species introgression and subsequent positive selection?

220 ***Response:** Thank you for this specific comment. Introgression of different bovine species occurs  
221 everywhere the species share territory. The cluster patterns indeed suggest sequences not  
222 originating from zebu, banteng, gaur or kouprey, but this may reflect, especially for the gaur,  
223 their limited sampling. For the selected genes, we have revised our manuscript and now refer  
224 to the selected genes as frequently introgressed genes.*

225 **[Comment of Reviewer #1]**

226 If I remember correctly, the globin gene family, and in particular the  $\alpha$ -globin chain, is known  
227 for a complicated evolution of paralogous genes, including recurrent mutations, gene  
228 conversion, co-evolution of different family members, and so on. Authors should check if  
229 complicated evolution of paralogous gene families could affect their conclusions.

230 ***Response:** Thank you for this specific comment. We checked that the bovine genome assembly  
231 shows two HBA genes that encode identical HbA subunits. We did not find reports on HbA  
232 rearrangements or paralogs that would invalidate our results.*

233 **[Comment of Reviewer #1]**

234 Figure S24 shows three chromosomal segments on BTA18. All three are located in the most

235 complex region of the *Bos taurus* and *Bos indicus* genomes (see  
236 <https://doi.org/10.3168/jemandes2021-21625>). The segmental duplication behaves similarly to  
237 the gene families mentioned above, and the region on BTA18 is very difficult to reconstruct  
238 correctly. The authors should check whether segmental duplication (in general) could influence  
239 their conclusions.

240 **Response:** *Thank you for this specific comment. The correct link to Dachs et al. (2021) is*  
241 *<https://doi.org/10.3168/jds.2021-21625>. This paper indeed mentions SVs near a QTL region on*  
242 *(BTA18, 57,816,000-59,430,000), close to the regions shown in Supplementary Fig. 24 (now in*  
243 *Supplementary Fig. 23, 60240001-60740000). Thirty of the 31 SVs are upstream of the regions*  
244 *we are studying, but one of their samples has a deletion of 59123315 to 61313922. This would*  
245 *delete all segments on which the three BTA18 trees in Supplementary Fig. 23 are based, but*  
246 *does not seem to influence the phylogenetic identification of introgression in other samples. In*  
247 *the legend of Fig. S23 we have mentioned the occurrence of this SV with reference to Dachs et*  
248 *al (2023).*

249 **[Comment of Reviewer #1]**

250 Other minor comments

251 Line 76-77, the authors write ...“was a direct consequence of a small number of genomic  
252 regions.” While it is conceivable that introgressed segments in EAI cattle did provide adaptive  
253 advantage, this statement is too strong especially considering that authors themselves have  
254 identified genomic segments under selection that were not introgressed from its wild relatives.  
255 Selection based on standing genetic variation should at least be discussed as a possibility.  
256 Further, authors should consider removing the phrase “direct consequence” as the authors did  
257 not provide any evidences showing direct and strong causality between introgressed segments  
258 and adaptation in EAI cattle.

259 **Response:** *Thank you for this suggestion. We have corrected the Abstract as suggested.*

260 **[Comment of Reviewer #1]**

261 Line 113,“..where have large local population are found” This sentence appears to be  
262 grammatically incorrect, please rephrase it.

263 **Response:** *Thank you for this valuable comment. We deleted “have”.*

264 **[Comment of Reviewer #1]**

265 Line 205, section, “Ancestral environmental adaptation of...” □ The authors should at least  
266 provide a sentence or two to give readers some information about the methods applied to  
267 identify signature of selection in this section. I am emphasizing this because when I started  
268 reading this section I was under the impression that the same set of methods were applied here  
269 as applied in the previous section, i.e. Fst, theta and XP-EHH, but it was not until the end of  
270 this section that it was mention that a different set of methods were applied, i.e. CLR and iHS.

271 **Response:** *Thank you for this suggestion. We have added the description in the first and last*  
272 *paragraphs.*

273 *First paragraph of the section:*



274 “Throughout the history of migration and admixture of indicine cattle, genomic regions under  
275 selection might have been lost in specific indicine groups. We therefore also performed a test  
276 for positive selection signatures in SAI cattle using  $\theta\pi$ ,  $iHS$ ,  $CLR$ , and  $F_{ST}$  estimates based on  
277 the comparison between SAI and non-SAI groups.”

278 *Last paragraph:*

279 “Additionally, we compared the light- and dark-coated SAI breeds, such as the white-coated  
280 Bhagnari and Dajal cattle from Pakistan, by using  $F_{ST}$  and  $\theta\pi$  ratio estimates. We identified  
281 shared selective sweeps around pigmentation loci, e.g.,  $LEF1$  and  $ASIP$ , in the light-coated  
282 indicine breeds (Fig. 2). This selection pressure may have been favored or driven by high  
283 temperatures and intense solar radiation and/or human preferences. Across the whole genomes,  
284 the  $CLR$  and  $iHS$  analyses revealed 368 regions overlapping with 477 genes present in AFI and  
285 SAI (Supplementary Table 8), supporting that the ancestral adaptations of SAI cattle were  
286 equally important for AFI cattle”

287 Moreover, the naming of the sections are also confusing, “the ancestral adaptation of indicine  
288 cattle”, “Ancestral environmental adaptation of south Asian indicine cattle”, “the indicine  
289 adaptation to the tropical, humid environment”. Ideally, signature of selection analysis should  
290 be performed without a priori expectation because it is very difficult to conclusively link the  
291 identified genes under selection with the breed characteristics; usually, it is done by functional  
292 genomics and by studying the literature extensively. Therefore, such naming of the sections is  
293 suitable to discussion but not to result section.

294 **Response:** *We agree and have renamed the sections.*

295

296 **Reviewer #2 (Remarks to the Author):**

297 **[Comment of Reviewer #2]**

298 Overall, the manuscript has improved significantly. I appreciate the author's willingness to  
299 make changes and incorporate suggestions. There are three documents as I see it, the main  
300 manuscript, the supplement and the response to previous review, all of which are lengthy. I have  
301 comments for each, which I'll address individually, but the most pressing issue relates to the  
302 ROH analysis under Supplementary Note 2: Genetic diversity. I'll start there because I think  
303 this needs addressed.

304 Response L358-400 and supplement L273-280. I still do not believe your ROH analysis is  
305 accurate. Even with your new analysis, you show a large number of individuals with a total  
306 genome length contained within ROH to be >1 Gb, or over a third of the genome. That is simply  
307 not realistic. There has been a large amount of prior literature on the subject, largely from SNP-  
308 chip data, and all of them show the "extreme" samples having under 1 Gb in ROH. I believe  
309 this [1] is an informative publication.  
310 [1] <https://bmcbgenomdata.biomedcentral.com/articles/10.1186/1471-2156-13-70> I believe  
311 Figure 5 from [1] is particularly useful in that it shows the same trend you are seeing in your  
312 data but the scale is quite different. This is particularly important because if the current  
313 manuscript is published it will present conflicting values because I believe you are including  
314 far too much of the genome in ROH. It is generally accepted that these types of ROH analysis  
315 are measuring recent inbreeding, which you acknowledge on L160 of the manuscript, where  
316 the size of ROH regions is proportional to the inbreeding coefficient. As the size of a ROH  
317 decreases you are estimating IBD further back in time. This may be appropriate in some cases,  
318 even perhaps the current manuscript, but your ability to differentiate old IBD regions from  
319 random chance or other population forces requires increased samples sizes, which you do not  
320 have. As I said, on it's face, I do not believe your ROH results. The question is, what is causing  
321 them to be elevated? In order to try to figure this out, I extracted 187 samples from your study  
322 that are also present within my UMAG1 call set, which is based on ~5500 genomes and VQSR.  
323 For these 187 samples, I extracted two sets of variants, A) all bi-allelic SNPS that passed VQSR  
324 and B) the positions contained on the Illumina Bovine HD and GGPF250 genotyping assays in  
325 order to compare with the results from [1].

326 A) "bcftools view --threads \$CPU -f PASS -m2 -M2 -v snps -S \$InputSamples --force-samples  
327 -Ob -o \$c.\$Prefix.bcf \$InputBcf"

328 B) "bcftools view --threads \$CPU -R \$c.variants2get.list --trim-alt-alleles -Ob -o \$c.\$Prefix.bcf  
329 \$InputBcf"

330 Dataset A produced 125M variants for these 187 samples.

331 bcftools +counts ChenAll.bcf

332 Number of samples: 187

333 Number of SNPs: 125813861

334 Number of INDELS: 0

335 Number of MNPs: 0

336 Number of others: 0

337 Number of sites: 125813861

338 Dataset B produced ~850K variants.

339 bcftools view -S chen\_sample.list --force-samples ChenChip.bcf -Ou | bcftools +counts  
340 Number of samples: 187  
341 Number of SNPs: 850772  
342 Number of INDELS: 64337  
343 Number of MNPs: 0  
344 Number of others: 0  
345 Number of sites: 897036  
346 The bcf files were then converted to plink bed/bim/bam:  
347 plink --bcf ChenAll.bcf --const-fid 0 --chr-set 29 --allow-extra-chr --out ChenAll  
348 plink --bcf ChenChip.bcf --const-fid 0 --chr-set 29 --allow-extra-chr --out ChenChip  
349 Finally, the ROH analysis was performed using various parameter values.  
350 The first run used the values specified on L279-280 of main paper and L389-396 of Response.  
351 I will refer to this as “ChenParameters”.  
352 plink --bfile ChenAll --chr-set 29 --chr 1-29 --homozyg --homozyg-gap 1000 --homozyg-kb  
353 100 --homozyg-snp 50 --homozyg-window-het 3 --homozyg-window-snp 50 --homozyg-  
354 window-threshold 0.05 --out ChenAll  
355 The second run was the same as above but changed --homozyg-window-het 3 to 1. I refer to  
356 this as Chen1het.  
357 The third run was the same as above but changed --homozyg-window-het 3 --> 1, --homozyg-  
358 snp 50 --> 200 --homozyg-window-snp 50 --> 100 --homozyg-snp 50 --> 200. I refer to this as  
359 ChenStrict.  
360 The loci from the SNP-chips were run the same as the second analysis above which used the  
361 author’s parameters but changed --homozyg-window-het 3 --> 1. I refer to this as Chip1het.  
362 All of the results from the \*.hom.indiv plink files were copied into Excel and visualized. See  
363 file ChenROHsubmitted.xlsx which should be available with this review. It is clear from Figure  
364 1 that I was able to recreate the trend that is shown in Supp. Figures 2 & 3 with my  
365 “ChenParameters” in blue. As I contend, these parameters still include too many ROH and  
366 encompass too much of the genome per individual. The “Chen1het” in orange only change --  
367 homozyg-window-het from 3 to 1 which produces values that more closely resemble prior  
368 literature and what we know about these populations. Therefore, I believe the root problem with  
369 the analyses, as presented, is this parameter. In hindsight, this makes sense as this parameter is  
370 meant to allow for genotyping error. By setting this parameter to 3 and requiring only 100 loci  
371 within a window, I believe you are effectively saying that you have little confidence in your  
372 genotype calls because you are allowing 3 errors (3% error rate) to still call a region as  
373 homozygous. If you are confident in your genotype calls, and new mutations are negligible  
374 (which I think is true here) then a value of 1 is more appropriate and in fact yields results closer  
375 to expectations. In order to more fully explore this, I also created a more strict dataset  
376 (ChenStrict) which required more loci while still maintaining 1 het position (grey). In order to  
377 provide a direct comparison to snp-chip data I also present the same as “Chip1het” in red. As  
378 you can see, the “Chip1het” is comparable to prior literature from using these assays. My final  
379 interpretation of these data is that the parameters used in the revision are still not appropriate,  
380 the main parameter to change is --homozyg-window-het and the correct values for the other  
381 parameters are somewhere between what was used and the “strict” values that I used. This is a  
382 fairly trivial analysis that the authors should perform and update the manuscript.

383 **Response:** Thank you for these valuable concerns and comments. We very much appreciate  
 384 your efforts! We agree that the “strict” values (ChenStrict) of the ROH detection method are  
 385 more accurate, so we used the “strict” value parameters outlined in your comments to detect  
 386 the ROH in our cattle data. The final parameters were set to a minimum length of 100 kb, a  
 387 scanning window size of 100 SNPs, a minimum density threshold of 200 SNPs, a large gap of  
 388 1000 kb, a maximum number of heterozygous SNPs in the scanning window of 1, and a scanning  
 389 window threshold level of 0.05. These settings yielded expected number (maximum number was  
 390 3259) and total length (maximum length was 1,138,710 Mb) of ROH (Supplementary Fig. 2).  
 391 Finally, we have updated Supplementary Note 2 and Supplementary Fig. 2.

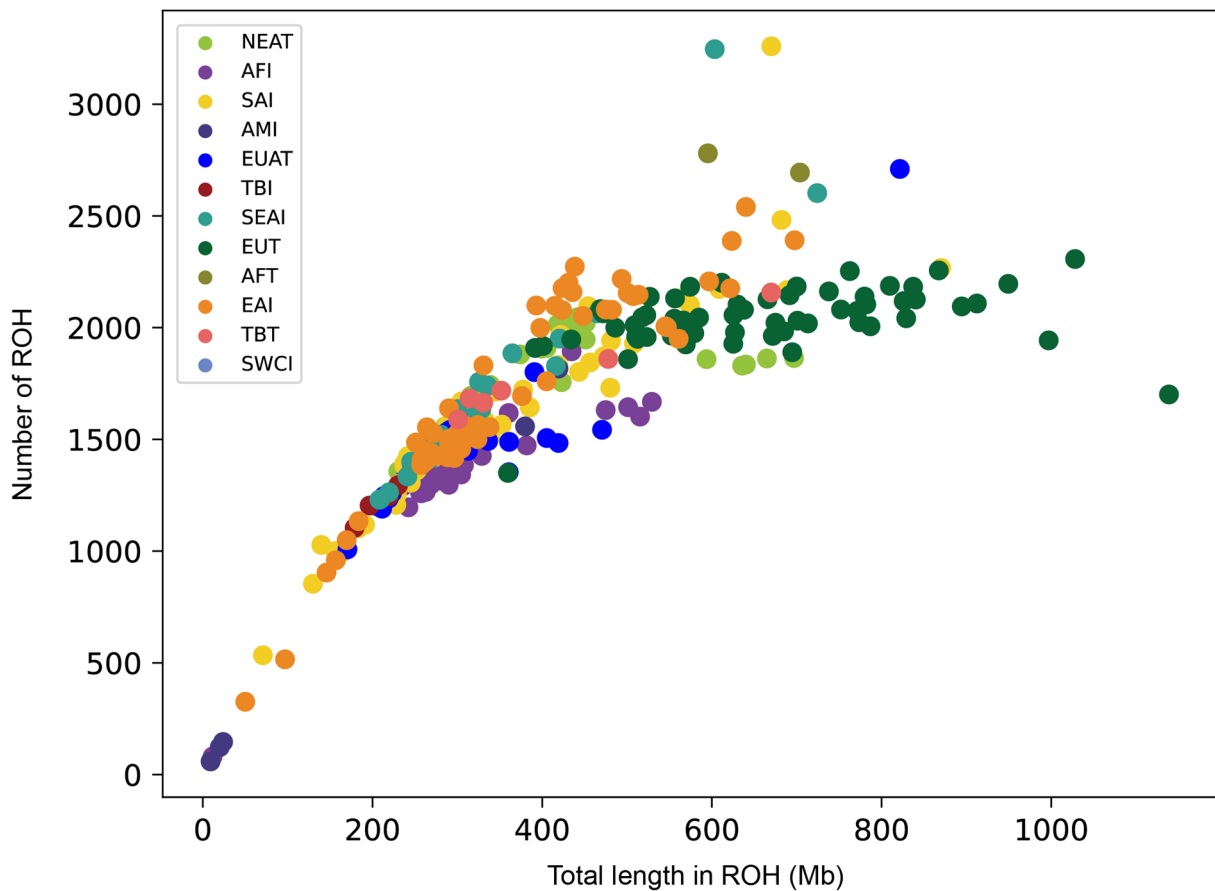

392  
 393 *Supplementary Fig. 2 Runs of homozygosity (ROH) patterns of all individuals from each cattle*  
 394 *geographic group.*

395 **[Comment of Reviewer #2]**

396 As before, I will provide comments on the Supplement by referring to SL as supplement line  
 397 number.

398 SL261-264: “The whole genome sequencing data from six other bovine species were mapped  
 399 in the same way. We used the 67,162,108 SNPs as a reference list to genotype the combined set  
 400 of 495 cattle samples and 22 samples of six other bovine species, resulting in 67,145,163 SNP  
 401 data with wild species data.”

402 It is unclear to me what you mean by “...as a referencelist...”? My initial interpretation of this  
 403 is that you added additional samples, called genotypes on those additional samples, and then

404 just extracted the 67M positions from the prior variant call set. Is this correct? The proper way  
405 to perform this analysis would be to recall genotypes from \*all\* of your samples starting with  
406 the combined GVCFs from SL253. This confusion is exacerbated by the third description in  
407 Supp. Table 3 which says “A total of 64,475,272 SNPs called from all 495 cattle and 22 genomes  
408 from other six bovine species.” Please clarify exactly what you did here.

409 *Response: Thank you for these valuable concerns and comments. We have rephrased this*  
410 *sentence: “We genotyped the combined set of 495 cattle samples and 22 samples of six other*  
411 *bovine species, and then extracted the 67,162,108 SNPs. After filtering out the non-biallelic*  
412 *SNPs, 67,145,163 autosomal SNPs were obtained.”*

413 **[Comment of Reviewer #2:]**

414 SL266 Supplementary Table 3 This table is very informative and helpful to the reader and this  
415 reviewer. However, now that I have this table, it presents new problems. For the second line of  
416 this table where it says “Imputed data of...” I assume this represents the phasing and imputation  
417 that you did with Beagle, correct? If so, please add the word “phased” to this description. This  
418 is a very important point later.

419 *Response: Thank you for these valuable concerns and comments. We indeed used phased and*  
420 *imputed and phased data. We revised the text as follows: “We used phased and imputed SNP*  
421 *data”.*

422 None of these numbers seem to add up, going back to my comment directly above. It seems to  
423 me that the proper way to analyze all of these data is to do joint genotyping on all samples  
424 simultaneously, which would be your 514 samples presented in Supp. Table 1. (Note that the  
425 second line of this table, and in the manuscript and supplement you refer to 495+22 which is  
426 517 but you only have 514 in Table1.) This will result in a total number of variants N. All  
427 analyses performed after this will involve some level of filtering or selection of loci but they all  
428 will go back to this original N variants. As it stands, this table helped clear up some issues but  
429 it presented more. For example the 6th description in the number of samples column, “All 495  
430 cattle and one yak”. Table 1 lists 3 yak while SL237 says two yak. Table 1 has 5 banteng while  
431 SL237 says eight. Figure 4 (F) of the main manuscript mentions Kouprey but I do not see any  
432 in table 1 as Kouprey or Bos sauveli. Where did this sample come from? Again, many of these  
433 numbers are not consistent.

434 *Response: Thank you for this suggestion. We have double-checked our tables.*

435 *We have 517 samples, including 495 cattle and 22 other bovine species samples. We have*  
436 *revised the number of samples. For the 6<sup>th</sup> description, we selected only one yak for the outgroup,*  
437 *but to ensure consistency, we reanalyzed the data using three yak for the outgroup. We have*  
438 *eight banteng and five gaur in our dataset, and we selected four pure banteng and 2 gaur*  
439 *samples for the introgression analysis. We apologize for our mistakes in Supplementary Table 1*  
440 *and we updated it, and we also added the ancient kouprey and gayal information to*  
441 *Supplementary Note 4.*

442 *“For the analysis of the introgressed region of BTA25 (0.21-0.26 Mb), we also used a gayal*  
443 *sample and an ancient kouprey sample to detect its origin. The coverage of gayal and kouprey*  
444 *was 17.32× and 1.4×, respectively. Due to the hybrid origin of gayal and low coverage of the*

445 *kouprey genome, we did not examine possible introgression of gayal and kouprey. The publicly*  
446 *available sequences were downloaded from China National GeneBank (CNGB) and the SRA*  
447 *with the following project accession numbers: CRX165997 (gayal, YD4) and PRJNA764746*  
448 *(kouprey).”*

449 **[Comment of Reviewer #2:]**

450 SL285 and 300 The PCA and admixture analysis used -indep-pairwise 50 10 0.1 while the NJ  
451 and ML phylogeny used --indep-pairwise 50 5 0.1. Why would you use different parameters  
452 for two different analyses to achieve the same objective of minimizing LD between the variants  
453 you use? By using different parameter sets you effectively make a direct comparison of these  
454 two analyses impossible because you changed the loci that you are using.

455 ***Response:** Thank you for this specific suggestion. This is a typo. We used -indep-pairwise 50*  
456 *10 0.1 for PCA and ML phylogenetic tree reconstruction, and all 67,162,108 autosomal SNPs*  
457 *were used to construct the NJ tree.*

458 **[Comment of Reviewer #2]**

459 SL312 “...XP-EHH score using selscan v.1.1 with default settings.” Selscan software did not  
460 have the ability to use unphased data until v2.0. Therefore, I assume that you are relying on the  
461 Beagle phased and imputed data for these analyses, is that correct? If so, this is why it is  
462 important to add the word phased to Supp. Table 1 because without doing the phasing in Beagle  
463 you could not have used selscan v.1.1.

464 ***Response:** Thank you for this valuable suggestion. We used phased and imputed data in selscan*  
465 *software, and we have added this information to Supplementary Table 1.*

466 **[Comment of Reviewer #2]**

467 SL329 “... using SweepFinder2.”

468 From the manual, it appears that this requires a recombination rate file. What did you use as the  
469 recombination rate between loci? My assumption is that you assumed a constant recombination  
470 rate of 1 cM/Mb since you do not actually have a recombination map. If that is the case, please  
471 state that in the manuscript. This software also requires a “B-value” for each variant. Where did  
472 you get these values from?

473 ***Response:** Thank you for this valuable comment.*

474 *In the CLR analysis, we did not use the recombination rate and B-value parameters. In*  
475 *SweepFinder2 software's instructions, there are five alternative methods for the selection scan,*  
476 *and the “recombination rate” and “B-value” are not required for each method. We applied*  
477 *“Scan for selective sweeps with pre-computed empirical spectrum” in SweepFinder2, and the*  
478 *parameter was “./SweepFinder2 --lu GridFile FreqFile SpectFile OutFile”.*

479 **[Comment of Reviewer #2]**

480 SL354: Why were EAI grouped into a single population without looking into recent specific  
481 breed introgression as the potential source of admixed genotypes?

482 ***Response:** Thank you for this valuable comment. We analyzed the breed averages of length and*  
483 *sum and added the D values. The EAI breeds have similar values.*

484 **[Comment of Reviewer #2]**

485 Often times the direction of admixture events is difficult to estimate. Is the signal of

486 introgression the result of the modern banteng/gaur samples having some amount of domestic  
487 cattle introgression in their genomes?

488 *Response: This indeed may happen, but such domestic->domestic introgression would not be*  
489 *detected by RFMix or by phylogenetic analysis.*

490 **[Comment of Reviewer #2]**

491 SL360-S365: The f3 data does not appear to be presented in Supplementary table 10, There  
492 appears to be a numbering issue of tables in the supplementary data document, with a shift of  
493 +1 after supplementary table 7.

494 *Response: Thank you for this specific suggestion. We added more details on the D statistic and*  
495 *f3 results to Supplementary Tables 10 and 11, and the Supplementary Dataset1. We have double-*  
496 *checked the numbers of Supplementary tables and figures.*

497 **[Comment of Reviewer #2]**

498 Main manuscript referring to ML as manuscript line number:

499 ML 76 "...was a direct consequence of..." That's a fairly strong claim. I think you evidence  
500 consistent with a hypothesis but I question whether it represents a direct consequence.

501 *Response: Thank you for this valuable comment. We have rephrased the text.*

502 **[Comment of Reviewer #2]**

503 ML113 remove the word have.

504 *Response: Thank you for this valuable comment. We have edited the text accordingly.*

505 **[Comment of Reviewer #2]**

506 ML261 Supp. Figure 16 has multiple pages of figures with the same panel labels but only 1  
507 legend. Please have a look at this as it appears it may have been an error when preparing the  
508 files for submission.

509 *Response: Thank you for this specific suggestion. We used DensiTree software to merge and*  
510 *visualize all 79 trees in one figure. Each line represents a tree, so this figure includes 79 trees.*

511 *Reference: Bouckaert, R.R. DensiTree: making sense of sets of phylogenetic trees.*  
512 *Bioinformatics 26, 1372-1373 (2010).*

513 **[Comment of Reviewer #2]**

514 ML264-266 "To identify regions in the EAI genomes that were likely under selection, we used  
515 a statistic to detect positively selected and introgressed genes (PSIGs)" Are these actually  
516 detecting genes or regions? You use both terms in the same sentence.

517 *Response: Thank you for this specific comment. We rephrased this sentence: "We used the U20*  
518 *statistic to identify frequently introgressed genes in the EAI genomes"*

519 **[Comment of Reviewer #2]**

520 ML351 Supp. Fig. 38 This is a much better figure than the previous version!

521 *Response: Thank you for this kind comment.*

522 **[Comment of Reviewer #2]**

523 ML512 "...gene transfer format (GTF) (GCF\_002263795.1) file." This is an accession for the  
524 genome assembly, it is NOT an accession for a gene set. I assume that you either used



525 annotations from NCBI or Ensembl, both of which have many different versions which are  
526 regularly updated. You need to specify which annotations you used (NCBI or Ensembl) and  
527 exactly which version of the annotation.

528 ***Response:*** *Thank you for this comment. We have updated the accessions for the gene set.*

529 *“As source of annotation, we used the source Bos taurus Annotation Release 106*  
530 *(GCF\_002263795.1\_ARS-UCD1.2\_genomic.gtf) based on the NCBI assembly of*  
531 *GCF\_002263795.1.”*

## **REVIEWERS' COMMENTS**

### **Reviewer #1 (Remarks to the Author):**

The authors have improved the manuscript considerably and have taken all my comments into account.

Therefore, I have no additional comments.

### **Reviewer #2 (Remarks to the Author):**

I have reviewed all of the material the authors provided. In my opinion, the authors have addressed the main issues that I have raised that needed to be addressed. At this point, there seem to still be some issues regarding methodology, but those are unlikely to be resolved as they are differences of opinion on how something should be done. Likewise, I believe there may still be some differences of opinion regarding interpretation of results. However, I see nothing that would preclude this manuscript from being published, and any perceived issues addressed through the normal scientific process.

Robert Schnabel
